# Supplementary material for: A microwave spectroscopic and quantum chemical study of propa-1,2-dienyl selenocyanate (H2CCHSeCN) and cyclopropyl selenocyanate (C3H5SeCN)
Source: Royal Society of Chemistry journal article supplement (doi:10.1039/b803562h), 2008-01-01
Supplement: b803562h.pdf [file b803562h.pdf]

A microwave spectroscopic and quantum chemical  
study of propa-1,2-dienyl selenocyanate

(H<sub>2</sub>=C=CHSeC≡N) and cyclopropyl selenocyanate

(C<sub>3</sub>H<sub>5</sub>SeC≡N)<sup>†</sup>

Rajmund Mokso,<sup>a</sup> Harald Møllendal<sup>\*a</sup> and Jean-Claude Guillemin<sup>b</sup>

*Electronic supplementary information (ESI)*

<sup>a</sup> Centre for Theoretical and Computational Chemistry (CTCC), Department of Chemistry,  
University of Oslo, P. O. Box 1033 Blindern, NO-0315 Oslo, Norway. E-mail:  
[harald.mollendal@kjemi.uio.no](mailto:harald.mollendal@kjemi.uio.no); Fax: +47 2285 5441; Tel: +47 2285 5674

<sup>b</sup> Sciences Chimiques de Rennes, École Nationale Supérieure de Chimie de Rennes-CNRS, F-  
35700 Rennes, France

## Preparation of the Compounds

### Selenocyanic Acid, Propa-1,2-diene Ester (Allenyl Selenocyanate)<sup>1</sup>

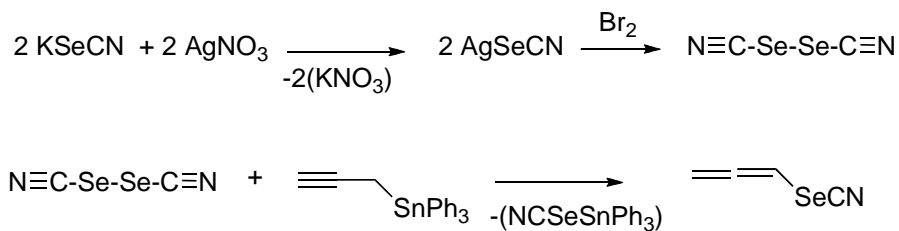

In a 250 mL three necked flask were introduced, under nitrogen, potassium selenocyanate (2.5 g, 17.5 mmol) and water (60 mL). Silver nitrate (3g, 17.5 mmol) was slowly added at room temperature by portions. After 30 min of stirring, the solution was filtrated and silver selenocyanate, dried under vacuum, was obtained as a white solid in a 92 % yield (3.41 g, 16.0 mmol).<sup>2</sup>

Silver selenocyanate (3.41 g, 16.0 mmol) dissolved in benzene (20 mL) was introduced in a 100 mL three necked flask equipped with a stirring bar, a dropping funnel and a nitrogen inlet. The flask was cooled at 10 °C and dibromine (1.28 g, 8 mmol) was then added dropwise. The mixture was stirred for 30 min, filtrated and introduced dropwise in another flask containing prop-2-ynyltriphenylstannane<sup>3</sup> (2.73 g, 7 mmol) in benzene (20 mL) at 10 °C. The mixture was stirred for 1 h and water was added. The reaction mixture was taken up in diethyl ether/water (3 x 50 mL). The organic phases were combined and dried over MgSO<sub>4</sub>. After filtration, the solvent was removed under vacuum. Selenocyanic acid, 1,2-propadiene ester was purified by distillation using a vacuum line and selective trapping at -30 °C. The presence of small amounts of

selenocyanic, 2-propynyl ester ( $\approx 3 - 5 \%$ ) cannot be avoided. This ratio increased on standing at room temperature and the sample should be kept at a low temperature ( $-30 \text{ }^\circ\text{C}$ ). Yield: 55 %; bp  $\approx 40 \text{ }^\circ\text{C}$  (0.1 mbar).  $^1\text{H}$  NMR (400 MHz,  $\text{CDCl}_3$ ):  $\delta$  5.17 (d,  $^4J_{\text{HH}} = 6.1 \text{ Hz}$ , 2H,  $\text{CH}_2$ ); 6.03 (t,  $^4J_{\text{HH}} = 6.1 \text{ Hz}$ ,  $^2J_{\text{SeH}} = 26.2 \text{ Hz}$ , 1H, CH-Se).  $^{13}\text{C}$  NMR (100 MHz,  $\text{CDCl}_3$ ):  $\delta$  71.2 (d,  $^1J_{\text{CH}} = 202.4 \text{ Hz}$ ,  $^1J_{\text{CSe}} = 89.2 \text{ Hz}$ , CH); 80.5 (t,  $^1J_{\text{CH}} = 170.9 \text{ Hz}$ ,  $\text{CH}_2$ ); 100.7 (s, CN), 208.5 (s,  $\text{C}=\text{C}=\text{C}$ ).  $^{77}\text{Se}$  NMR (57.2 MHz,  $\text{CDCl}_3$ ):  $\delta$  277.4.

#### Selenocyanic acid, Cyclopropane Ester (Cyclopropyl Selenocyanate).

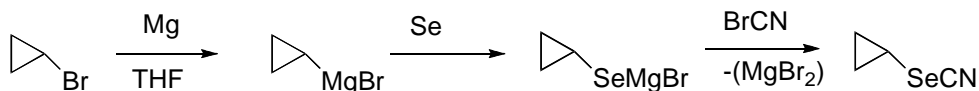

Cyclopropylmagnesium bromide was prepared by slow addition of cyclopropyl bromide (6.05 g, 50 mmol) in THF (30 mL) to Mg (1.2 g, 50 mmol) in THF (20 mL) at  $0 \text{ }^\circ\text{C}$ . The solution was then warmed to  $50 \text{ }^\circ\text{C}$  for 20 min and then cooled to  $0 \text{ }^\circ\text{C}$ , at which time selenium powder (3.95 g, 50 mmol) was added by portions in 10 min and then stirred at room temperature for 30 min. The solution was introduced into a dropping funnel and poured into a 250 mL flask containing a cooled ( $-40 \text{ }^\circ\text{C}$ ) solution of cyanogen bromide (5.1 g, 48 mmol) in THF (20 mL). The solution was then allowed to warm to room temperature and stirred for 20 min. Water (20 mL) was added and the organic phase was separated, the aqueous layer was extracted with diethyl ether ( $2 \times 30 \text{ mL}$ ). The organic phases were combined and dried with  $\text{MgSO}_4$ . The solvent was removed in vacuo and purification was performed by distillation in vacuo. Bp:  $40 \text{ }^\circ\text{C}$  (0.1 mmHg). Yield:

3.31 g, 22.5 mmol, 45 %.  $^1\text{H}$  NMR ( $\text{CDCl}_3$ )  $\delta$  0.93 (td,  $^3J_{\text{HH}} = 6.6$  Hz,  $^3J_{\text{HH}} = 4.3$  Hz, 2H cycle); 1.16 (td,  $^3J_{\text{HH}} = 7.4$  Hz,  $^3J_{\text{HH}} = 6.6$  Hz, 2H cycle); 2.53 (tt,  $^3J_{\text{HH}} = 7.4$  Hz,  $^3J_{\text{HH}} = 4.3$  Hz, 1H, CH).  $^{13}\text{C}$  NMR ( $\text{CDCl}_3$ )  $\delta$  8.55 (d,  $^1J_{\text{CH}} = 187.9$  Hz, CH); 9.13 (t,  $^1J_{\text{CH}} = 164.6$  Hz,  $\text{CH}_2$ ); 101.6 (s, CN).  $^{77}\text{Se}$  NMR ( $\text{CDCl}_3$ )  $\delta$  322.4.

## Comments for Spectroscopic Tables:

**Hamiltonian:** Watson's A-reduction  $I'$  representation<sup>4</sup>

**Transition labels:**  $J'' K_{-1}'' K_{+1}'' J' K_{-1}' J K_{+1}'$

**obs. – calc.:** the observed – the calculated residuals

**weight:** the estimated uncertainties of the observed frequencies. Each transition is weighted according to the inverse square of its estimated uncertainty

**t:** Student's t-test<sup>5</sup>

**distortion correction:** centrifugal distortion correction

**total:** correction from quartic and sextic (if included) centrifugal distortion constants

**higher:** contribution from sextic centrifugal distortion constants

**fixed:** contribution from fixed quartic and/or fixed sextic centrifugal distortion constants. The values of fixed constants are also displayed.

**rms deviation:** root-mean-square deviation. Defined dimensionless in a weighted least-squares fit<sup>5</sup>

**$\kappa$ :** Ray's asymmetry parameter<sup>6</sup> defined by  $\kappa = (2B - A - C)/(A - C)$

**Inertial defect:** defined by  $\Delta = I_c - I_a - I_b$

**Significant digits:** the number of significant digits of each fitted constant are listed on the diagonal of the correlation matrix.

**Units:** the observed frequencies, the residuals, the distortion corrections, and the rotational constants are in MHz, the quartic centrifugal distortion constants are in kHz, the sextic centrifugal distortion constants are in Hz, and the principal axis inertial constants and the inertial defect are in  $\text{u } \text{Å}^2$ .

**Table 1S** Microwave spectrum of the ground vibrational state of the *anticlinal* conformer of H<sub>2</sub>C=C=CH<sup>80</sup>SeCN

Total number of transitions: 156

| Transition |    |    |    |    | obs. frequency | obs.-<br>calc. | weight | t    | distortion | corrections |        |        |
|------------|----|----|----|----|----------------|----------------|--------|------|------------|-------------|--------|--------|
|            |    |    |    |    |                |                |        |      | total      | higher      | fixed  |        |
| 19         | 5  | 14 | 20 | 5  | 15             | 49518.900      | -0.012 | 0.10 | -0.2       | -11.594     | -0.178 | -0.676 |
| 19         | 7  | 13 | 20 | 7  | 14             | 49313.360      | -0.173 | 0.10 | -1.1       | 6.187       | -0.362 | -0.718 |
| 19         | 7  | 12 | 20 | 7  | 13             | 49313.360      | -0.267 | 0.10 | -1.7       | 6.186       | -0.362 | -0.717 |
| 19         | 8  | 12 | 20 | 8  | 13             | 49278.560      | 0.239  | 0.10 | 1.6        | 16.315      | -0.475 | -0.605 |
| 19         | 8  | 11 | 20 | 8  | 12             | 49278.560      | 0.237  | 0.10 | 1.6        | 16.315      | -0.475 | -0.605 |
| 19         | 9  | 11 | 20 | 9  | 12             | 49258.870      | -0.063 | 0.10 | -0.4       | 27.602      | -0.603 | -0.469 |
| 19         | 9  | 10 | 20 | 9  | 11             | 49258.870      | -0.063 | 0.10 | -0.4       | 27.602      | -0.603 | -0.469 |
| 19         | 14 | 6  | 20 | 14 | 7              | 49267.610      | 0.325  | 0.10 | 2.2        | 102.681     | -1.464 | 0.532  |
| 19         | 14 | 5  | 20 | 14 | 6              | 49267.610      | 0.325  | 0.10 | 2.2        | 102.681     | -1.464 | 0.532  |
| 20         | 7  | 14 | 21 | 7  | 15             | 51796.750      | -0.053 | 0.10 | -0.3       | 3.496       | -0.419 | -0.874 |
| 20         | 7  | 13 | 21 | 7  | 14             | 51796.750      | -0.232 | 0.10 | -1.5       | 3.494       | -0.419 | -0.871 |
| 20         | 8  | 13 | 21 | 8  | 14             | 51754.720      | -0.182 | 0.10 | -1.2       | 14.215      | -0.550 | -0.759 |
| 20         | 8  | 12 | 21 | 8  | 13             | 51754.720      | -0.187 | 0.10 | -1.2       | 14.215      | -0.550 | -0.759 |
| 21         | 5  | 16 | 22 | 5  | 17             | 54589.300      | -0.119 | 0.20 | -0.5       | -20.942     | -0.230 | -0.755 |
| 21         | 6  | 16 | 22 | 6  | 17             | 54365.510      | -0.044 | 0.20 | -0.1       | -9.941      | -0.349 | -1.158 |
| 21         | 10 | 12 | 22 | 10 | 13             | 54189.640      | -0.058 | 0.10 | -0.4       | 38.004      | -0.991 | -0.620 |
| 21         | 10 | 11 | 22 | 10 | 12             | 54189.640      | -0.058 | 0.10 | -0.4       | 38.004      | -0.991 | -0.620 |
| 22         | 5  | 18 | 23 | 5  | 19             | 56981.800      | -0.163 | 0.20 | -0.6       | -23.476     | -0.270 | -1.719 |
| 22         | 6  | 17 | 23 | 6  | 18             | 56866.100      | 0.085  | 0.10 | 0.6        | -14.273     | -0.396 | -1.360 |
| 22         | 6  | 16 | 23 | 6  | 17             | 56878.770      | 0.314  | 0.15 | 1.4        | -14.550     | -0.395 | -1.221 |
| 22         | 8  | 15 | 23 | 8  | 16             | 56713.550      | -0.188 | 0.10 | -1.2       | 8.606       | -0.720 | -1.119 |
| 22         | 8  | 14 | 23 | 8  | 15             | 56713.550      | -0.207 | 0.10 | -1.3       | 8.605       | -0.720 | -1.119 |
| 22         | 9  | 14 | 23 | 9  | 15             | 56680.130      | 0.147  | 0.10 | 0.9        | 21.784      | -0.915 | -0.974 |
| 22         | 9  | 13 | 23 | 9  | 14             | 56680.130      | 0.146  | 0.10 | 0.9        | 21.784      | -0.915 | -0.974 |
| 22         | 10 | 13 | 23 | 10 | 14             | 56661.430      | 0.155  | 0.10 | 1.0        | 36.276      | -1.132 | -0.803 |
| 22         | 10 | 12 | 23 | 10 | 13             | 56661.430      | 0.155  | 0.10 | 1.0        | 36.276      | -1.132 | -0.803 |
| 23         | 8  | 16 | 24 | 8  | 17             | 59196.230      | 0.048  | 0.10 | 0.3        | 5.035       | -0.816 | -1.326 |
| 23         | 8  | 15 | 24 | 8  | 16             | 59196.230      | 0.010  | 0.10 | 0.1        | 5.034       | -0.816 | -1.325 |
| 23         | 9  | 15 | 24 | 9  | 16             | 59156.660      | 0.096  | 0.10 | 0.6        | 18.881      | -1.038 | -1.180 |
| 23         | 9  | 14 | 24 | 9  | 15             | 59156.660      | 0.095  | 0.10 | 0.6        | 18.881      | -1.038 | -1.180 |
| 23         | 10 | 14 | 24 | 10 | 15             | 59134.120      | 0.159  | 0.10 | 1.0        | 34.061      | -1.285 | -1.005 |
| 23         | 10 | 13 | 24 | 10 | 14             | 59134.120      | 0.159  | 0.10 | 1.0        | 34.061      | -1.285 | -1.005 |
| 24         | 8  | 17 | 25 | 8  | 18             | 61680.800      | 0.026  | 0.10 | 0.2        | 0.910       | -0.921 | -1.552 |
| 24         | 8  | 16 | 25 | 8  | 17             | 61680.800      | -0.044 | 0.10 | -0.3       | 0.908       | -0.921 | -1.550 |
| 24         | 9  | 16 | 25 | 9  | 17             | 61634.540      | -0.166 | 0.10 | -1.0       | 15.447      | -1.172 | -1.406 |
| 24         | 9  | 15 | 25 | 9  | 16             | 61634.540      | -0.168 | 0.10 | -1.0       | 15.447      | -1.172 | -1.406 |
| 24         | 10 | 15 | 25 | 10 | 16             | 61607.910      | 0.107  | 0.10 | 0.7        | 31.331      | -1.451 | -1.228 |
| 24         | 10 | 14 | 25 | 10 | 15             | 61607.910      | 0.107  | 0.10 | 0.7        | 31.331      | -1.451 | -1.228 |
| 24         | 11 | 14 | 25 | 11 | 15             | 61593.800      | 0.060  | 0.10 | 0.4        | 48.657      | -1.759 | -1.022 |
| 24         | 11 | 13 | 25 | 11 | 14             | 61593.800      | 0.060  | 0.10 | 0.4        | 48.657      | -1.759 | -1.022 |
| 24         | 12 | 13 | 25 | 12 | 14             | 61589.070      | 0.244  | 0.10 | 1.5        | 67.481      | -2.096 | -0.789 |
| 24         | 12 | 12 | 25 | 12 | 13             | 61589.070      | 0.244  | 0.10 | 1.5        | 67.481      | -2.096 | -0.789 |
| 25         | 6  | 20 | 26 | 6  | 21             | 64387.180      | 0.284  | 0.10 | 2.3        | -30.824     | -0.563 | -2.128 |
| 25         | 6  | 20 | 26 | 6  | 21             | 64387.180      | 0.284  | 0.10 | 2.3        | -30.824     | -0.563 | -2.128 |
| 25         | 6  | 19 | 26 | 6  | 20             | 64432.830      | -0.053 | 0.10 | -0.6       | -32.240     | -0.555 | -1.621 |
| 25         | 8  | 18 | 26 | 8  | 19             | 64167.480      | -0.134 | 0.15 | -0.5       | -3.802      | -1.033 | -1.796 |
| 25         | 8  | 17 | 26 | 8  | 18             | 64167.480      | -0.260 | 0.15 | -1.1       | -3.806      | -1.033 | -1.792 |
| 25         | 9  | 17 | 26 | 9  | 18             | 64114.400      | -0.075 | 0.10 | -0.5       | 11.454      | -1.316 | -1.651 |
| 25         | 9  | 16 | 26 | 9  | 17             | 64114.400      | -0.079 | 0.10 | -0.5       | 11.454      | -1.316 | -1.651 |
| 25         | 10 | 16 | 26 | 10 | 17             | 64082.620      | -0.229 | 0.10 | -1.4       | 28.059      | -1.630 | -1.472 |
| 25         | 10 | 15 | 26 | 10 | 16             | 64082.620      | -0.230 | 0.10 | -1.4       | 28.059      | -1.630 | -1.472 |
| 25         | 11 | 15 | 26 | 11 | 16             | 64065.470      | -0.095 | 0.15 | -0.4       | 46.130      | -1.977 | -1.262 |

|    |    |    |    |    |    |           |        |      |      |         |        |        |
|----|----|----|----|----|----|-----------|--------|------|------|---------|--------|--------|
| 25 | 11 | 14 | 26 | 11 | 15 | 64065.470 | -0.095 | 0.15 | -0.4 | 46.130  | -1.977 | -1.262 |
| 25 | 12 | 14 | 26 | 12 | 15 | 64058.820 | 0.374  | 0.15 | 1.5  | 65.736  | -2.356 | -1.024 |
| 25 | 12 | 13 | 26 | 12 | 14 | 64058.820 | 0.374  | 0.15 | 1.5  | 65.736  | -2.356 | -1.024 |
| 25 | 15 | 11 | 26 | 15 | 12 | 64076.590 | 0.039  | 0.10 | 0.2  | 134.124 | -3.689 | -0.139 |
| 25 | 15 | 10 | 26 | 15 | 11 | 64076.590 | 0.039  | 0.10 | 0.2  | 134.124 | -3.689 | -0.139 |
| 25 | 16 | 10 | 26 | 16 | 11 | 64091.890 | 0.063  | 0.10 | 0.4  | 160.177 | -4.198 | 0.214  |
| 25 | 16 | 9  | 26 | 16 | 10 | 64091.890 | 0.063  | 0.10 | 0.4  | 160.177 | -4.198 | 0.214  |
| 25 | 17 | 9  | 26 | 17 | 10 | 64110.230 | -0.375 | 0.10 | -2.5 | 187.879 | -4.741 | 0.599  |
| 25 | 17 | 8  | 26 | 17 | 9  | 64110.230 | -0.375 | 0.10 | -2.5 | 187.879 | -4.741 | 0.599  |
| 26 | 6  | 21 | 27 | 6  | 22 | 66899.010 | -0.418 | 0.25 | -1.1 | -37.595 | -0.626 | -2.454 |
| 26 | 7  | 20 | 27 | 7  | 21 | 66755.670 | 0.322  | 0.20 | 1.0  | -24.025 | -0.872 | -2.177 |
| 26 | 7  | 19 | 27 | 7  | 20 | 66760.300 | 0.217  | 0.25 | 0.5  | -24.190 | -0.871 | -2.090 |
| 26 | 8  | 19 | 27 | 8  | 20 | 66656.780 | -0.023 | 0.12 | -0.1 | -9.138  | -1.154 | -2.059 |
| 26 | 8  | 18 | 27 | 8  | 19 | 66656.780 | -0.247 | 0.12 | -1.3 | -9.145  | -1.154 | -2.053 |
| 26 | 9  | 18 | 27 | 9  | 19 | 66595.630 | -0.313 | 0.10 | -1.9 | 6.869   | -1.471 | -1.917 |
| 26 | 9  | 17 | 27 | 9  | 18 | 66595.630 | -0.321 | 0.10 | -2.0 | 6.869   | -1.471 | -1.916 |
| 26 | 10 | 17 | 27 | 10 | 18 | 66558.980 | -0.167 | 0.12 | -0.9 | 24.216  | -1.824 | -1.737 |
| 26 | 10 | 16 | 27 | 10 | 17 | 66558.980 | -0.168 | 0.12 | -0.9 | 24.216  | -1.824 | -1.737 |
| 26 | 11 | 16 | 27 | 11 | 17 | 66538.090 | -0.233 | 0.10 | -1.4 | 43.046  | -2.212 | -1.524 |
| 26 | 11 | 15 | 27 | 11 | 16 | 66538.090 | -0.233 | 0.10 | -1.4 | 43.046  | -2.212 | -1.524 |
| 26 | 14 | 13 | 27 | 14 | 14 | 66533.120 | 0.236  | 0.10 | 1.5  | 109.130 | -3.596 | -0.708 |
| 26 | 14 | 12 | 27 | 14 | 13 | 66533.120 | 0.236  | 0.10 | 1.5  | 109.130 | -3.596 | -0.708 |
| 26 | 15 | 12 | 27 | 15 | 13 | 66543.550 | 0.093  | 0.10 | 0.6  | 134.475 | -4.130 | -0.377 |
| 26 | 15 | 11 | 27 | 15 | 12 | 66543.550 | 0.093  | 0.10 | 0.6  | 134.475 | -4.130 | -0.377 |
| 26 | 17 | 10 | 27 | 17 | 11 | 66577.220 | 0.048  | 0.10 | 0.3  | 190.252 | -5.308 | 0.380  |
| 26 | 17 | 9  | 27 | 17 | 10 | 66577.220 | 0.048  | 0.10 | 0.3  | 190.252 | -5.308 | 0.380  |
| 26 | 18 | 9  | 27 | 18 | 10 | 66598.970 | -0.288 | 0.10 | -2.0 | 220.707 | -5.953 | 0.808  |
| 26 | 18 | 8  | 27 | 18 | 9  | 66598.970 | -0.288 | 0.10 | -2.0 | 220.707 | -5.953 | 0.808  |
| 27 | 6  | 22 | 28 | 6  | 23 | 69413.990 | 0.057  | 0.10 | 9.9  | -45.008 | -0.693 | -2.826 |
| 27 | 6  | 21 | 28 | 6  | 22 | 69513.230 | 0.137  | 0.20 | 0.7  | -48.644 | -0.673 | -1.746 |
| 27 | 7  | 21 | 28 | 7  | 22 | 69259.510 | 0.260  | 0.20 | 0.8  | -30.847 | -0.967 | -2.464 |
| 27 | 7  | 20 | 28 | 7  | 21 | 69267.120 | 0.345  | 0.15 | 1.5  | -31.138 | -0.965 | -2.326 |
| 27 | 9  | 19 | 28 | 9  | 20 | 69079.120 | -0.061 | 0.10 | -0.4 | 1.661   | -1.638 | -2.203 |
| 27 | 9  | 18 | 28 | 9  | 19 | 69079.120 | -0.076 | 0.10 | -0.5 | 1.660   | -1.638 | -2.203 |
| 27 | 10 | 18 | 28 | 10 | 19 | 69036.910 | 0.164  | 0.10 | 1.0  | 19.772  | -2.032 | -2.024 |
| 27 | 10 | 17 | 28 | 10 | 18 | 69036.910 | 0.164  | 0.10 | 1.0  | 19.772  | -2.032 | -2.024 |
| 27 | 16 | 12 | 28 | 16 | 13 | 69025.320 | 0.142  | 0.10 | 0.9  | 162.284 | -5.242 | -0.270 |
| 27 | 16 | 11 | 28 | 16 | 12 | 69025.320 | 0.142  | 0.10 | 0.9  | 162.284 | -5.242 | -0.270 |
| 27 | 17 | 11 | 28 | 17 | 12 | 69043.670 | -0.145 | 0.10 | -0.9 | 192.063 | -5.919 | 0.134  |
| 27 | 17 | 10 | 28 | 17 | 11 | 69043.670 | -0.145 | 0.10 | -0.9 | 192.063 | -5.919 | 0.134  |
| 28 | 7  | 22 | 29 | 7  | 23 | 71766.450 | 0.055  | 0.25 | 0.1  | -38.407 | -1.069 | -2.774 |
| 28 | 7  | 21 | 29 | 7  | 22 | 71778.220 | 0.097  | 0.15 | 0.4  | -38.905 | -1.065 | -2.560 |
| 28 | 9  | 20 | 29 | 9  | 21 | 71564.250 | -0.013 | 0.10 | -0.1 | -4.206  | -1.816 | -2.510 |
| 28 | 9  | 19 | 29 | 9  | 20 | 71564.250 | -0.039 | 0.10 | -0.2 | -4.207  | -1.816 | -2.509 |
| 28 | 10 | 19 | 29 | 10 | 20 | 71515.690 | -0.005 | 0.10 | -0.0 | 14.698  | -2.254 | -2.334 |
| 28 | 10 | 18 | 29 | 10 | 19 | 71515.690 | -0.006 | 0.10 | -0.0 | 14.698  | -2.254 | -2.334 |
| 28 | 12 | 17 | 29 | 12 | 18 | 71471.370 | -0.207 | 0.15 | -0.8 | 57.108  | -3.264 | -1.869 |
| 28 | 12 | 16 | 29 | 12 | 17 | 71471.370 | -0.207 | 0.15 | -0.8 | 57.108  | -3.264 | -1.869 |
| 28 | 13 | 16 | 29 | 13 | 17 | 71466.380 | -0.097 | 0.12 | -0.5 | 80.811  | -3.835 | -1.587 |
| 28 | 13 | 15 | 29 | 13 | 16 | 71466.380 | -0.097 | 0.12 | -0.5 | 80.811  | -3.835 | -1.587 |
| 28 | 14 | 15 | 29 | 14 | 16 | 71469.100 | -0.051 | 0.12 | -0.3 | 106.253 | -4.452 | -1.274 |
| 28 | 14 | 14 | 29 | 14 | 15 | 71469.100 | -0.051 | 0.12 | -0.3 | 106.253 | -4.452 | -1.274 |
| 28 | 16 | 13 | 29 | 16 | 14 | 71492.310 | 0.215  | 0.12 | 1.1  | 162.471 | -5.822 | -0.552 |
| 28 | 16 | 12 | 29 | 16 | 13 | 71492.310 | 0.215  | 0.12 | 1.1  | 162.471 | -5.822 | -0.552 |
| 28 | 17 | 12 | 29 | 17 | 13 | 71510.410 | -0.121 | 0.10 | -0.8 | 193.289 | -6.575 | -0.140 |
| 28 | 17 | 11 | 29 | 17 | 12 | 71510.410 | -0.121 | 0.10 | -0.8 | 193.289 | -6.575 | -0.140 |
| 29 | 7  | 22 | 30 | 7  | 23 | 74294.970 | 0.274  | 0.10 | 4.0  | -47.569 | -1.170 | -2.785 |
| 29 | 10 | 20 | 30 | 10 | 21 | 73995.990 | -0.055 | 0.10 | -0.3 | 8.961   | -2.492 | -2.666 |
| 29 | 10 | 19 | 30 | 10 | 20 | 73995.990 | -0.057 | 0.10 | -0.4 | 8.961   | -2.492 | -2.666 |
| 29 | 14 | 16 | 30 | 14 | 17 | 73938.100 | 0.218  | 0.10 | 1.4  | 103.906 | -4.927 | -1.597 |
| 29 | 14 | 15 | 30 | 14 | 16 | 73938.100 | 0.218  | 0.10 | 1.4  | 103.906 | -4.927 | -1.597 |
| 29 | 16 | 14 | 30 | 16 | 15 | 73959.230 | 0.055  | 0.10 | 0.3  | 162.050 | -6.444 | -0.861 |

|                   |           |        |      |      |         |         |        |
|-------------------|-----------|--------|------|------|---------|---------|--------|
| 29 16 13 30 16 14 | 73959.230 | 0.055  | 0.10 | 0.3  | 162.050 | -6.444  | -0.861 |
| 29 17 13 30 17 14 | 73977.300 | -0.023 | 0.10 | -0.1 | 193.904 | -7.278  | -0.442 |
| 29 17 12 30 17 13 | 73977.300 | -0.023 | 0.10 | -0.1 | 193.904 | -7.278  | -0.442 |
| 29 18 12 30 18 13 | 73999.700 | 0.119  | 0.10 | 0.8  | 227.636 | -8.162  | 0.015  |
| 29 18 11 30 18 12 | 73999.700 | 0.119  | 0.10 | 0.8  | 227.636 | -8.162  | 0.015  |
| 30 9 22 31 9 23   | 76540.060 | -0.202 | 0.10 | -1.3 | -18.053 | -2.207  | -3.188 |
| 30 9 21 31 9 22   | 76540.060 | -0.285 | 0.10 | -1.9 | -18.057 | -2.207  | -3.184 |
| 30 10 21 31 10 22 | 76477.920 | 0.072  | 0.10 | 0.5  | 2.530   | -2.745  | -3.021 |
| 30 10 20 31 10 21 | 76477.920 | 0.069  | 0.10 | 0.4  | 2.530   | -2.745  | -3.021 |
| 30 11 20 31 11 21 | 76439.340 | -0.035 | 0.10 | -0.2 | 24.575  | -3.336  | -2.808 |
| 30 11 19 31 11 20 | 76439.340 | -0.035 | 0.10 | -0.2 | 24.575  | -3.336  | -2.808 |
| 30 12 19 31 12 20 | 76417.320 | -0.145 | 0.10 | -0.9 | 48.257  | -3.980  | -2.555 |
| 30 12 18 31 12 19 | 76417.320 | -0.145 | 0.10 | -0.9 | 48.257  | -3.980  | -2.555 |
| 30 16 15 31 16 16 | 76426.480 | 0.057  | 0.10 | 0.4  | 160.994 | -7.108  | -1.199 |
| 30 16 14 31 16 15 | 76426.480 | 0.057  | 0.10 | 0.4  | 160.994 | -7.108  | -1.199 |
| 30 17 14 31 17 15 | 76444.250 | 0.059  | 0.10 | 0.4  | 193.887 | -8.028  | -0.772 |
| 30 17 13 31 17 14 | 76444.250 | 0.059  | 0.10 | 0.4  | 193.887 | -8.028  | -0.772 |
| 30 18 13 31 18 14 | 76466.410 | 0.058  | 0.10 | 0.4  | 228.707 | -9.004  | -0.308 |
| 30 18 12 31 18 13 | 76466.410 | 0.058  | 0.10 | 0.4  | 228.707 | -9.004  | -0.308 |
| 30 19 12 31 19 13 | 76492.180 | -0.229 | 0.10 | -1.6 | 265.470 | -10.035 | 0.195  |
| 30 19 11 31 19 12 | 76492.180 | -0.229 | 0.10 | -1.6 | 265.470 | -10.035 | 0.195  |
| 31 8 24 32 8 25   | 79141.700 | 0.135  | 0.20 | 0.5  | -46.490 | -1.886  | -3.667 |
| 31 9 23 32 9 24   | 79031.030 | -0.309 | 0.15 | -1.3 | -26.107 | -2.421  | -3.558 |
| 31 9 22 32 9 23   | 79031.030 | -0.450 | 0.15 | -2.0 | -26.115 | -2.421  | -3.552 |
| 31 10 22 32 10 23 | 78961.090 | -0.067 | 0.10 | -0.4 | -4.629  | -3.014  | -3.400 |
| 31 10 21 32 10 22 | 78961.090 | -0.072 | 0.10 | -0.5 | -4.629  | -3.014  | -3.399 |
| 31 11 21 32 11 22 | 78917.230 | -0.087 | 0.10 | -0.6 | 18.277  | -3.664  | -3.190 |
| 31 11 20 32 11 21 | 78917.230 | -0.088 | 0.10 | -0.6 | 18.277  | -3.664  | -3.190 |
| 31 12 20 32 12 21 | 78891.840 | 0.219  | 0.10 | 1.4  | 42.819  | -4.374  | -2.937 |
| 31 12 19 32 12 20 | 78891.840 | 0.219  | 0.10 | 1.4  | 42.819  | -4.374  | -2.937 |
| 31 14 18 32 14 19 | 78876.800 | 0.210  | 0.10 | 1.3  | 97.269  | -5.974  | -2.322 |
| 31 14 17 32 14 18 | 78876.800 | 0.210  | 0.10 | 1.3  | 97.269  | -5.974  | -2.322 |
| 31 15 17 32 15 18 | 78882.200 | 0.214  | 0.10 | 1.4  | 127.309 | -6.865  | -1.962 |
| 31 15 16 32 15 17 | 78882.200 | 0.214  | 0.10 | 1.4  | 127.309 | -6.865  | -1.962 |
| 31 16 16 32 16 17 | 78893.810 | -0.032 | 0.10 | -0.2 | 159.281 | -7.816  | -1.566 |
| 31 16 15 32 16 16 | 78893.810 | -0.032 | 0.10 | -0.2 | 159.281 | -7.816  | -1.566 |
| 31 17 15 32 17 16 | 78911.220 | 0.087  | 0.10 | 0.6  | 193.212 | -8.829  | -1.133 |
| 31 17 14 32 17 15 | 78911.220 | 0.087  | 0.10 | 0.6  | 193.212 | -8.829  | -1.133 |
| 31 18 14 32 18 15 | 78933.130 | 0.013  | 0.10 | 0.1  | 229.121 | -9.902  | -0.662 |
| 31 18 13 32 18 14 | 78933.130 | 0.013  | 0.10 | 0.1  | 229.121 | -9.902  | -0.662 |
| 31 19 13 32 19 14 | 78959.030 | -0.217 | 0.12 | -1.3 | 267.024 | -11.036 | -0.151 |
| 31 19 12 32 19 13 | 78959.030 | -0.217 | 0.12 | -1.3 | 267.024 | -11.036 | -0.151 |

rms deviation: 1.6350

Rotational constants (MHz) and kappa:

|    |         |           |           |          |
|----|---------|-----------|-----------|----------|
|    | 5487.38 | 1325.4530 | 1129.3318 | -0.91000 |
| +- | 5.6     | 0.081     | 0.089     | 0.00006  |

Inertial constants and defect (uÅ\*\*2):

|    |         |           |           |       |
|----|---------|-----------|-----------|-------|
|    | 92.0985 | 381.28781 | 447.50272 | -25.9 |
| +- | 0.093   | 0.023     | 0.035     | 0.1   |

Quartic distortion constants:

|    |          |          |       |         |        |
|----|----------|----------|-------|---------|--------|
|    | 0.697001 | -16.1413 | 190   | 0.29906 | -0.993 |
| +- | 0.0041   | 0.021    | fixed | 0.017   | fixed  |



Sextic distortion constants:

|     |       |          |       |       |       |       |       |
|-----|-------|----------|-------|-------|-------|-------|-------|
|     | 0     | -0.23357 | 0     | 0     | 0     | 0     | 0     |
| + - | fixed | 0.013    | fixed | fixed | fixed | fixed | fixed |

Significant Digits and Correlation Matrix:

|   |       |        |        |        |        |        |
|---|-------|--------|--------|--------|--------|--------|
| 6 | 0.928 | -0.890 | -0.212 | -0.242 | 0.278  | -0.202 |
| 8 |       | -0.994 | -0.515 | -0.438 | 0.604  | -0.431 |
|   |       | 8      | 0.598  | 0.511  | -0.672 | 0.511  |
|   |       |        | 6      | 0.738  | -0.937 | 0.862  |
|   |       |        |        | 6      | -0.601 | 0.960  |
|   |       |        |        |        | 5      | -0.717 |
|   |       |        |        |        |        | 5      |

**Table 2S** Microwave spectrum of the first excited state of the C-Se torsion of the anticlinal conformer of H<sub>2</sub>C=C=CH<sup>80</sup>SeCN

Total number of transitions: 173

| Transition |    |    |    |    | obs. frequency | obs.-<br>calc. | weight | t    | distortion corrections |         |        |        |
|------------|----|----|----|----|----------------|----------------|--------|------|------------------------|---------|--------|--------|
|            |    |    |    |    |                |                |        |      | total                  | higher  | fixed  |        |
| 19         | 7  | 13 | 20 | 7  | 14             | 49534.090      | 0.190  | 0.10 | 1.7                    | 5.197   | -0.229 | -0.732 |
| 19         | 7  | 12 | 20 | 7  | 13             | 49534.090      | 0.085  | 0.10 | 0.8                    | 5.197   | -0.229 | -0.730 |
| 19         | 8  | 12 | 20 | 8  | 13             | 49497.320      | 0.045  | 0.10 | 0.4                    | 16.235  | -0.301 | -0.616 |
| 19         | 8  | 11 | 20 | 8  | 12             | 49497.320      | 0.042  | 0.10 | 0.4                    | 16.235  | -0.301 | -0.616 |
| 19         | 9  | 11 | 20 | 9  | 12             | 49477.330      | -0.083 | 0.10 | -0.8                   | 28.616  | -0.381 | -0.477 |
| 19         | 9  | 10 | 20 | 9  | 11             | 49477.330      | -0.083 | 0.10 | -0.8                   | 28.616  | -0.381 | -0.477 |
| 19         | 14 | 6  | 20 | 14 | 7              | 49490.070      | -0.122 | 0.10 | -1.1                   | 111.528 | -0.926 | 0.544  |
| 19         | 14 | 5  | 20 | 14 | 6              | 49490.070      | -0.122 | 0.10 | -1.1                   | 111.528 | -0.926 | 0.544  |
| 19         | 15 | 5  | 20 | 15 | 6              | 49504.820      | 0.084  | 0.10 | 0.7                    | 132.380 | -1.063 | 0.815  |
| 19         | 15 | 4  | 20 | 15 | 5              | 49504.820      | 0.084  | 0.10 | 0.7                    | 132.380 | -1.063 | 0.815  |
| 19         | 16 | 4  | 20 | 16 | 5              | 49521.980      | 0.118  | 0.12 | 0.9                    | 154.667 | -1.210 | 1.112  |
| 19         | 16 | 3  | 20 | 16 | 4              | 49521.980      | 0.118  | 0.12 | 0.9                    | 154.667 | -1.210 | 1.112  |
| 19         | 18 | 2  | 20 | 18 | 3              | 49562.700      | -0.183 | 0.20 | -0.8                   | 203.554 | -1.532 | 1.782  |
| 19         | 18 | 1  | 20 | 18 | 2              | 49562.700      | -0.183 | 0.20 | -0.8                   | 203.554 | -1.532 | 1.782  |
| 20         | 8  | 13 | 21 | 8  | 14             | 51984.930      | -0.253 | 0.15 | -1.4                   | 13.711  | -0.348 | -0.774 |
| 20         | 8  | 12 | 21 | 8  | 13             | 51984.930      | -0.259 | 0.15 | -1.5                   | 13.711  | -0.348 | -0.773 |
| 20         | 11 | 10 | 21 | 11 | 11             | 51945.530      | 0.277  | 0.20 | 1.2                    | 57.143  | -0.661 | -0.275 |
| 20         | 11 | 9  | 21 | 11 | 10             | 51945.530      | 0.277  | 0.20 | 1.2                    | 57.143  | -0.661 | -0.275 |
| 20         | 12 | 9  | 21 | 12 | 10             | 51947.960      | 0.054  | 0.20 | 0.2                    | 74.550  | -0.787 | -0.063 |
| 20         | 12 | 8  | 21 | 12 | 9              | 51947.960      | 0.054  | 0.20 | 0.2                    | 74.550  | -0.787 | -0.063 |
| 20         | 14 | 7  | 21 | 14 | 8              | 51966.670      | -0.005 | 0.15 | -0.0                   | 113.830 | -1.072 | 0.429  |
| 20         | 14 | 6  | 21 | 14 | 7              | 51966.670      | -0.005 | 0.15 | -0.0                   | 113.830 | -1.072 | 0.429  |
| 20         | 15 | 6  | 21 | 15 | 7              | 51981.400      | 0.141  | 0.15 | 0.8                    | 135.716 | -1.231 | 0.712  |
| 20         | 15 | 5  | 21 | 15 | 6              | 51981.400      | 0.141  | 0.15 | 0.8                    | 135.716 | -1.231 | 0.712  |
| 20         | 16 | 5  | 21 | 16 | 6              | 51998.800      | 0.124  | 0.20 | 0.5                    | 159.105 | -1.401 | 1.020  |
| 20         | 16 | 4  | 21 | 16 | 5              | 51998.800      | 0.124  | 0.20 | 0.5                    | 159.105 | -1.401 | 1.020  |
| 21         | 9  | 13 | 22 | 9  | 14             | 54445.270      | -0.369 | 0.25 | -1.2                   | 24.374  | -0.507 | -0.802 |
| 21         | 9  | 12 | 22 | 9  | 13             | 54445.270      | -0.369 | 0.25 | -1.2                   | 24.374  | -0.507 | -0.802 |
| 22         | 8  | 15 | 23 | 8  | 16             | 56966.770      | -0.117 | 0.10 | -1.0                   | 7.103   | -0.455 | -1.141 |
| 22         | 8  | 14 | 23 | 8  | 15             | 56966.770      | -0.139 | 0.10 | -1.2                   | 7.103   | -0.455 | -1.141 |
| 22         | 9  | 14 | 23 | 9  | 15             | 56931.870      | -0.050 | 0.10 | -0.4                   | 21.475  | -0.579 | -0.993 |
| 22         | 9  | 13 | 23 | 9  | 14             | 56931.870      | -0.051 | 0.10 | -0.4                   | 21.475  | -0.579 | -0.993 |
| 22         | 10 | 13 | 23 | 10 | 14             | 56912.770      | -0.156 | 0.10 | -1.3                   | 37.380  | -0.716 | -0.817 |
| 22         | 10 | 12 | 23 | 10 | 13             | 56912.770      | -0.156 | 0.10 | -1.3                   | 37.380  | -0.716 | -0.817 |
| 22         | 13 | 10 | 23 | 13 | 11             | 56910.280      | 0.188  | 0.15 | 1.1                    | 94.631  | -1.213 | -0.139 |
| 22         | 13 | 9  | 23 | 13 | 10             | 56910.280      | 0.188  | 0.15 | 1.1                    | 94.631  | -1.213 | -0.139 |
| 22         | 14 | 9  | 23 | 14 | 10             | 56920.680      | 0.179  | 0.25 | 0.6                    | 116.951 | -1.408 | 0.138  |
| 22         | 14 | 8  | 23 | 14 | 9              | 56920.680      | 0.179  | 0.25 | 0.6                    | 116.951 | -1.408 | 0.138  |
| 22         | 15 | 8  | 23 | 15 | 9              | 56934.970      | 0.110  | 0.15 | 0.6                    | 140.904 | -1.617 | 0.442  |
| 22         | 15 | 7  | 23 | 15 | 8              | 56934.970      | 0.110  | 0.15 | 0.6                    | 140.904 | -1.617 | 0.442  |
| 22         | 17 | 6  | 23 | 17 | 7              | 56973.370      | 0.023  | 0.10 | 0.2                    | 193.731 | -2.077 | 1.132  |
| 22         | 17 | 5  | 23 | 17 | 6              | 56973.370      | 0.023  | 0.10 | 0.2                    | 193.731 | -2.077 | 1.132  |
| 23         | 8  | 16 | 24 | 8  | 17             | 59460.870      | -0.017 | 0.10 | -0.1                   | 2.957   | -0.516 | -1.353 |
| 23         | 8  | 15 | 24 | 8  | 16             | 59460.870      | -0.060 | 0.10 | -0.5                   | 2.957   | -0.516 | -1.352 |
| 23         | 9  | 15 | 24 | 9  | 16             | 59419.760      | 0.019  | 0.10 | 0.2                    | 18.018  | -0.657 | -1.203 |
| 23         | 9  | 14 | 24 | 9  | 15             | 59419.760      | 0.018  | 0.10 | 0.2                    | 18.018  | -0.657 | -1.203 |
| 23         | 10 | 14 | 24 | 10 | 15             | 59396.656      | -0.002 | 0.20 | -0.0                   | 34.654  | -0.813 | -1.024 |
| 23         | 10 | 13 | 24 | 10 | 14             | 59396.656      | -0.002 | 0.20 | -0.0                   | 34.654  | -0.813 | -1.024 |
| 23         | 11 | 13 | 24 | 11 | 14             | 59385.540      | -0.224 | 0.25 | -0.8                   | 52.916  | -0.985 | -0.817 |
| 23         | 11 | 12 | 24 | 11 | 13             | 59385.540      | -0.224 | 0.25 | -0.8                   | 52.916  | -0.985 | -0.817 |
| 23         | 15 | 9  | 24 | 15 | 10             | 59411.940      | -0.014 | 0.12 | -0.1                   | 142.707 | -1.836 | 0.273  |
| 23         | 15 | 8  | 24 | 15 | 9              | 59411.940      | -0.014 | 0.12 | -0.1                   | 142.707 | -1.836 | 0.273  |

|    |    |    |    |    |    |           |        |      |      |         |        |         |
|----|----|----|----|----|----|-----------|--------|------|------|---------|--------|---------|
| 23 | 16 | 8  | 24 | 16 | 9  | 59429.880 | 0.144  | 0.12 | 1.0  | 169.399 | -2.090 | 0.614   |
| 23 | 16 | 7  | 24 | 16 | 8  | 59429.880 | 0.144  | 0.12 | 1.0  | 169.399 | -2.090 | 0.614   |
| 23 | 17 | 7  | 24 | 17 | 8  | 59450.640 | -0.119 | 0.25 | -0.4 | 197.802 | -2.360 | 0.986   |
| 23 | 17 | 6  | 24 | 17 | 7  | 59450.640 | -0.119 | 0.25 | -0.4 | 197.802 | -2.360 | 0.986   |
| 23 | 18 | 6  | 24 | 18 | 7  | 59474.450 | -0.244 | 0.25 | -0.8 | 227.922 | -2.646 | 1.389   |
| 23 | 18 | 5  | 24 | 18 | 6  | 59474.450 | -0.244 | 0.25 | -0.8 | 227.922 | -2.646 | 1.389   |
| 24 | 8  | 17 | 25 | 8  | 18 | 61957.150 | 0.022  | 0.10 | 0.2  | -1.791  | -0.582 | -1.583  |
| 24 | 8  | 16 | 25 | 8  | 17 | 61957.150 | -0.057 | 0.10 | -0.5 | -1.792  | -0.582 | -1.581  |
| 24 | 10 | 15 | 25 | 10 | 16 | 61881.600 | 0.029  | 0.12 | 0.2  | 31.352  | -0.918 | -1.251  |
| 24 | 10 | 14 | 25 | 10 | 15 | 61881.600 | 0.029  | 0.12 | 0.2  | 31.352  | -0.918 | -1.251  |
| 24 | 12 | 13 | 25 | 12 | 14 | 61863.630 | 0.188  | 0.25 | 0.6  | 71.170  | -1.326 | -0.801  |
| 24 | 12 | 12 | 25 | 12 | 13 | 61863.630 | 0.188  | 0.25 | 0.6  | 71.170  | -1.326 | -0.801  |
| 24 | 14 | 11 | 25 | 14 | 12 | 61875.400 | -0.154 | 0.25 | -0.5 | 117.929 | -1.807 | -0.242  |
| 24 | 14 | 10 | 25 | 14 | 11 | 61875.400 | -0.154 | 0.25 | -0.5 | 117.929 | -1.807 | -0.242  |
| 24 | 15 | 10 | 25 | 15 | 11 | 61889.290 | 0.038  | 0.10 | 0.3  | 143.949 | -2.075 | 0.081   |
| 24 | 15 | 9  | 25 | 15 | 10 | 61889.290 | 0.038  | 0.10 | 0.3  | 143.949 | -2.075 | 0.081   |
| 24 | 16 | 9  | 25 | 16 | 10 | 61907.270 | 0.297  | 0.15 | 1.7  | 171.741 | -2.362 | 0.432   |
| 24 | 16 | 8  | 25 | 16 | 9  | 61907.270 | 0.297  | 0.15 | 1.7  | 171.741 | -2.362 | 0.432   |
| 25 | 6  | 20 | 26 | 6  | 21 | 64685.720 | 0.120  | 0.15 | 0.8  | -35.607 | -0.355 | -2.181  |
| 25 | 8  | 18 | 26 | 8  | 19 | 64455.930 | 0.213  | 0.20 | 0.9  | -7.174  | -0.653 | -1.833  |
| 25 | 8  | 17 | 26 | 8  | 18 | 64455.930 | 0.069  | 0.20 | 0.3  | -7.175  | -0.653 | -1.829  |
| 25 | 10 | 16 | 26 | 10 | 17 | 64367.360 | -0.356 | 0.20 | -1.5 | 27.446  | -1.031 | -1.500  |
| 25 | 10 | 15 | 26 | 10 | 16 | 64367.360 | -0.357 | 0.20 | -1.5 | 27.446  | -1.031 | -1.500  |
| 25 | 11 | 15 | 26 | 11 | 16 | 64350.370 | -0.031 | 0.10 | -0.3 | 47.296  | -1.251 | -1.285  |
| 25 | 11 | 14 | 26 | 11 | 15 | 64350.370 | -0.031 | 0.10 | -0.3 | 47.296  | -1.251 | -1.285  |
| 25 | 12 | 14 | 26 | 12 | 15 | 64344.290 | 0.366  | 0.20 | 1.5  | 68.913  | -1.491 | -1.041  |
| 25 | 12 | 13 | 26 | 12 | 14 | 64344.290 | 0.366  | 0.20 | 1.5  | 68.913  | -1.491 | -1.041  |
| 25 | 13 | 13 | 26 | 13 | 14 | 64345.460 | -0.106 | 0.20 | -0.4 | 92.325  | -1.751 | -0.768  |
| 25 | 13 | 12 | 26 | 13 | 13 | 64345.460 | -0.106 | 0.20 | -0.4 | 92.325  | -1.751 | -0.768  |
| 25 | 14 | 12 | 26 | 14 | 13 | 64353.820 | 0.249  | 0.12 | 1.7  | 117.552 | -2.032 | -0.467  |
| 25 | 14 | 11 | 26 | 14 | 12 | 64353.820 | 0.249  | 0.12 | 1.7  | 117.552 | -2.032 | -0.467  |
| 25 | 17 | 9  | 26 | 17 | 10 | 64405.800 | 0.118  | 0.10 | 1.0  | 204.234 | -3.000 | 0.619   |
| 25 | 17 | 8  | 26 | 17 | 9  | 64405.800 | 0.118  | 0.10 | 1.0  | 204.234 | -3.000 | 0.619   |
| 25 | 18 | 8  | 26 | 18 | 9  | 64430.000 | -0.412 | 0.15 | -2.4 | 236.821 | -3.363 | 1.045   |
| 25 | 18 | 7  | 26 | 18 | 8  | 64430.000 | -0.412 | 0.15 | -2.4 | 236.821 | -3.363 | 1.045   |
| 26 | 6  | 21 | 27 | 6  | 22 | 67210.960 | -0.076 | 0.10 | -1.5 | -43.013 | -0.395 | -2.518  |
| 26 | 7  | 20 | 27 | 7  | 21 | 67060.800 | 0.529  | 0.20 | 2.3  | -28.947 | -0.551 | -2.224  |
| 26 | 7  | 19 | 27 | 7  | 20 | 67065.760 | 0.170  | 0.20 | 0.7  | -29.052 | -0.550 | -2.129  |
| 26 | 8  | 19 | 27 | 8  | 20 | 66956.880 | 0.113  | 0.10 | 1.0  | -13.225 | -0.730 | -2.102  |
| 26 | 8  | 18 | 27 | 8  | 19 | 66956.880 | -0.142 | 0.10 | -1.2 | -13.229 | -0.730 | -2.095  |
| 26 | 9  | 18 | 27 | 9  | 19 | 66893.170 | -0.003 | 0.10 | -0.0 | 4.010   | -0.931 | -1.956  |
| 26 | 9  | 17 | 27 | 9  | 18 | 66893.170 | -0.012 | 0.10 | -0.1 | 4.010   | -0.931 | -1.956  |
| 26 | 10 | 17 | 27 | 10 | 18 | 66855.320 | 0.174  | 0.10 | 1.5  | 22.907  | -1.154 | -1.772  |
| 26 | 10 | 16 | 27 | 10 | 17 | 66855.320 | 0.173  | 0.10 | 1.5  | 22.907  | -1.154 | -1.772  |
| 26 | 12 | 15 | 27 | 12 | 16 | 66825.050 | -0.047 | 0.15 | -0.3 | 66.038  | -1.668 | -1.304  |
| 26 | 12 | 14 | 27 | 12 | 15 | 66825.050 | -0.047 | 0.15 | -0.3 | 66.038  | -1.668 | -1.304  |
| 26 | 13 | 14 | 27 | 13 | 15 | 66825.050 | 0.024  | 0.15 | 0.1  | 90.363  | -1.960 | -1.026  |
| 26 | 13 | 13 | 27 | 13 | 14 | 66825.050 | 0.024  | 0.15 | 0.1  | 90.363  | -1.960 | -1.026  |
| 26 | 16 | 11 | 27 | 16 | 12 | 66861.950 | 0.154  | 0.20 | 0.6  | 174.643 | -2.974 | -7.2E-3 |
| 26 | 16 | 10 | 27 | 16 | 11 | 66861.950 | 0.154  | 0.20 | 0.6  | 174.643 | -2.974 | -7.2E-3 |
| 26 | 18 | 9  | 27 | 18 | 10 | 66907.920 | -0.296 | 0.10 | -2.6 | 240.363 | -3.766 | 0.834   |
| 26 | 18 | 8  | 27 | 18 | 9  | 66907.920 | -0.296 | 0.10 | -2.6 | 240.363 | -3.766 | 0.834   |
| 27 | 7  | 21 | 28 | 7  | 22 | 69577.170 | 0.318  | 0.20 | 1.4  | -36.470 | -0.611 | -2.518  |
| 27 | 9  | 19 | 28 | 9  | 20 | 69387.840 | -0.056 | 0.15 | -0.3 | -1.975  | -1.036 | -2.249  |
| 27 | 9  | 18 | 28 | 9  | 19 | 69387.840 | -0.072 | 0.15 | -0.4 | -1.975  | -1.036 | -2.248  |
| 27 | 10 | 18 | 28 | 10 | 19 | 69344.020 | 0.106  | 0.10 | 0.9  | 17.705  | -1.285 | -2.065  |
| 27 | 10 | 17 | 28 | 10 | 18 | 69344.020 | 0.105  | 0.10 | 0.9  | 17.705  | -1.285 | -2.065  |
| 27 | 11 | 17 | 28 | 11 | 18 | 69318.550 | -0.263 | 0.12 | -1.9 | 39.180  | -1.560 | -1.845  |
| 27 | 11 | 16 | 28 | 11 | 17 | 69318.550 | -0.263 | 0.12 | -1.9 | 39.180  | -1.560 | -1.845  |
| 27 | 14 | 14 | 28 | 14 | 15 | 69310.630 | -0.016 | 0.10 | -0.1 | 114.935 | -2.536 | -0.993  |
| 27 | 14 | 13 | 28 | 14 | 14 | 69310.630 | -0.016 | 0.10 | -0.1 | 114.935 | -2.536 | -0.993  |
| 27 | 15 | 13 | 28 | 15 | 14 | 69322.630 | 0.182  | 0.10 | 1.5  | 144.062 | -2.913 | -0.646  |

|    |    |    |    |    |    |           |        |      |      |         |        |        |
|----|----|----|----|----|----|-----------|--------|------|------|---------|--------|--------|
| 27 | 15 | 12 | 28 | 15 | 13 | 69322.630 | 0.182  | 0.10 | 1.5  | 144.062 | -2.913 | -0.646 |
| 27 | 16 | 12 | 28 | 16 | 13 | 69339.230 | -0.157 | 0.10 | -1.3 | 175.153 | -3.316 | -0.267 |
| 27 | 16 | 11 | 28 | 16 | 12 | 69339.230 | -0.157 | 0.10 | -1.3 | 175.153 | -3.316 | -0.267 |
| 27 | 17 | 11 | 28 | 17 | 12 | 69360.880 | 0.141  | 0.12 | 1.0  | 208.218 | -3.745 | 0.146  |
| 27 | 17 | 10 | 28 | 17 | 11 | 69360.880 | 0.141  | 0.12 | 1.0  | 208.218 | -3.745 | 0.146  |
| 28 | 7  | 22 | 29 | 7  | 23 | 72096.790 | -0.045 | 0.15 | -0.3 | -44.756 | -0.675 | -2.837 |
| 28 | 7  | 21 | 29 | 7  | 22 | 72110.420 | 0.388  | 0.25 | 1.4  | -45.088 | -0.673 | -2.603 |
| 28 | 9  | 20 | 29 | 9  | 21 | 71884.500 | -0.041 | 0.10 | -0.3 | -8.671  | -1.148 | -2.563 |
| 28 | 9  | 19 | 29 | 9  | 20 | 71884.500 | -0.071 | 0.10 | -0.6 | -8.671  | -1.148 | -2.562 |
| 28 | 10 | 19 | 29 | 10 | 20 | 71833.980 | -0.094 | 0.10 | -0.8 | 11.811  | -1.426 | -2.382 |
| 28 | 10 | 18 | 29 | 10 | 19 | 71833.980 | -0.095 | 0.10 | -0.8 | 11.811  | -1.426 | -2.382 |
| 28 | 12 | 17 | 29 | 12 | 18 | 71789.640 | 0.022  | 0.20 | 0.1  | 58.325  | -2.065 | -1.905 |
| 28 | 12 | 16 | 29 | 12 | 17 | 71789.640 | 0.022  | 0.20 | 0.1  | 58.325  | -2.065 | -1.905 |
| 28 | 13 | 16 | 29 | 13 | 17 | 71785.300 | -0.205 | 0.10 | -1.7 | 84.490  | -2.426 | -1.616 |
| 28 | 13 | 15 | 29 | 13 | 16 | 71785.300 | -0.205 | 0.10 | -1.7 | 84.490  | -2.426 | -1.616 |
| 28 | 14 | 15 | 29 | 14 | 16 | 71789.640 | -0.086 | 0.20 | -0.4 | 112.644 | -2.817 | -1.294 |
| 28 | 14 | 14 | 29 | 14 | 15 | 71789.640 | -0.086 | 0.20 | -0.4 | 112.644 | -2.817 | -1.294 |
| 28 | 16 | 13 | 29 | 16 | 14 | 71817.020 | -0.082 | 0.10 | -0.7 | 175.000 | -3.684 | -0.553 |
| 28 | 16 | 12 | 29 | 16 | 13 | 71817.020 | -0.082 | 0.10 | -0.7 | 175.000 | -3.684 | -0.553 |
| 28 | 17 | 12 | 29 | 17 | 13 | 71838.150 | -0.167 | 0.10 | -1.5 | 209.231 | -4.160 | -0.132 |
| 28 | 17 | 11 | 29 | 17 | 12 | 71838.150 | -0.167 | 0.10 | -1.5 | 209.231 | -4.160 | -0.132 |
| 29 | 7  | 23 | 30 | 7  | 24 | 74620.380 | 0.201  | 0.15 | 1.2  | -53.839 | -0.743 | -3.186 |
| 29 | 9  | 21 | 30 | 9  | 22 | 74383.300 | 0.108  | 0.10 | 0.9  | -16.110 | -1.268 | -2.899 |
| 29 | 9  | 20 | 30 | 9  | 21 | 74383.300 | 0.053  | 0.10 | 0.5  | -16.111 | -1.268 | -2.897 |
| 29 | 11 | 19 | 30 | 11 | 20 | 74291.380 | 0.079  | 0.10 | 0.7  | 28.340  | -1.914 | -2.501 |
| 29 | 11 | 18 | 30 | 11 | 19 | 74291.380 | 0.079  | 0.10 | 0.7  | 28.340  | -1.914 | -2.501 |
| 29 | 12 | 18 | 30 | 12 | 19 | 74273.090 | 0.070  | 0.10 | 0.6  | 53.431  | -2.284 | -2.243 |
| 29 | 12 | 17 | 30 | 12 | 18 | 74273.090 | 0.070  | 0.10 | 0.6  | 53.431  | -2.284 | -2.243 |
| 29 | 13 | 17 | 30 | 13 | 18 | 74266.900 | 0.340  | 0.20 | 1.4  | 80.526  | -2.685 | -1.950 |
| 29 | 13 | 16 | 30 | 13 | 17 | 74266.900 | 0.340  | 0.20 | 1.4  | 80.526  | -2.685 | -1.950 |
| 29 | 15 | 15 | 30 | 15 | 16 | 74279.090 | 0.025  | 0.20 | 0.1  | 140.868 | -3.581 | -1.263 |
| 29 | 15 | 14 | 30 | 15 | 15 | 74279.090 | 0.025  | 0.20 | 0.1  | 140.868 | -3.581 | -1.263 |
| 29 | 16 | 14 | 30 | 16 | 15 | 74294.970 | 0.026  | 0.10 | 0.2  | 174.161 | -4.077 | -0.869 |
| 29 | 16 | 13 | 30 | 16 | 14 | 74294.970 | 0.026  | 0.10 | 0.2  | 174.161 | -4.077 | -0.869 |
| 29 | 17 | 13 | 30 | 17 | 14 | 74315.960 | 0.032  | 0.20 | 0.1  | 209.555 | -4.605 | -0.439 |
| 29 | 17 | 12 | 30 | 17 | 13 | 74315.960 | 0.032  | 0.20 | 0.1  | 209.555 | -4.605 | -0.439 |
| 30 | 7  | 23 | 31 | 7  | 24 | 77177.090 | -0.080 | 0.10 | 9.9  | -64.677 | -0.807 | -3.033 |
| 30 | 9  | 22 | 31 | 9  | 23 | 76884.070 | 0.134  | 0.10 | 1.2  | -24.328 | -1.396 | -3.257 |
| 30 | 9  | 21 | 31 | 9  | 22 | 76884.070 | 0.038  | 0.10 | 0.3  | -24.330 | -1.396 | -3.253 |
| 30 | 11 | 20 | 31 | 11 | 21 | 76779.020 | -0.148 | 0.10 | -1.3 | 21.826  | -2.110 | -2.867 |
| 30 | 11 | 19 | 31 | 11 | 20 | 76779.020 | -0.148 | 0.10 | -1.3 | 21.826  | -2.110 | -2.867 |
| 30 | 16 | 15 | 31 | 16 | 16 | 76772.910 | -0.005 | 0.12 | -0.0 | 172.609 | -4.497 | -1.213 |
| 30 | 16 | 14 | 31 | 16 | 15 | 76772.910 | -0.005 | 0.12 | -0.0 | 172.609 | -4.497 | -1.213 |
| 30 | 17 | 14 | 31 | 17 | 15 | 76793.650 | 0.078  | 0.15 | 0.5  | 209.167 | -5.079 | -0.775 |
| 30 | 17 | 13 | 31 | 17 | 14 | 76793.650 | 0.078  | 0.15 | 0.5  | 209.167 | -5.079 | -0.775 |
| 31 | 8  | 24 | 32 | 8  | 25 | 79502.670 | -0.177 | 0.20 | -0.8 | -54.741 | -1.192 | -3.748 |
| 31 | 8  | 23 | 32 | 8  | 24 | 79506.340 | 0.283  | 0.15 | 1.7  | -54.845 | -1.191 | -3.661 |
| 31 | 9  | 23 | 32 | 9  | 24 | 79386.870 | 0.006  | 0.10 | 0.1  | -33.359 | -1.531 | -3.636 |
| 31 | 9  | 22 | 32 | 9  | 23 | 79386.870 | -0.159 | 0.10 | -1.5 | -33.364 | -1.531 | -3.630 |
| 31 | 10 | 22 | 32 | 10 | 23 | 79313.280 | -0.196 | 0.10 | -1.7 | -10.339 | -1.906 | -3.474 |
| 31 | 10 | 21 | 32 | 10 | 22 | 79313.280 | -0.202 | 0.10 | -1.8 | -10.339 | -1.906 | -3.473 |
| 31 | 11 | 21 | 32 | 11 | 22 | 79268.270 | 0.099  | 0.10 | 0.9  | 14.543  | -2.318 | -3.258 |
| 31 | 11 | 20 | 32 | 11 | 21 | 79268.270 | 0.099  | 0.10 | 0.9  | 14.543  | -2.318 | -3.258 |
| 31 | 12 | 20 | 32 | 12 | 21 | 79242.190 | -0.045 | 0.10 | -0.4 | 41.429  | -2.767 | -2.998 |
| 31 | 12 | 19 | 32 | 12 | 20 | 79242.190 | -0.045 | 0.10 | -0.4 | 41.429  | -2.767 | -2.998 |
| 31 | 15 | 17 | 32 | 15 | 18 | 79236.840 | 0.173  | 0.10 | 1.5  | 134.817 | -4.343 | -1.994 |
| 31 | 15 | 16 | 32 | 15 | 17 | 79236.840 | 0.173  | 0.10 | 1.5  | 134.817 | -4.343 | -1.994 |
| 31 | 16 | 16 | 32 | 16 | 17 | 79251.160 | 0.142  | 0.12 | 1.1  | 170.317 | -4.945 | -1.587 |
| 31 | 16 | 15 | 32 | 16 | 16 | 79251.160 | 0.142  | 0.12 | 1.1  | 170.317 | -4.945 | -1.587 |

rms deviation: 1.1929

Rotational constants (MHz) and kappa:  
 5614.39      1334.6089      1130.7037      -0.90905  
 +-            8.1            0.086            0.087            0.00010

Inertial constants and defect (uÅ\*\*2):  
 90.0150      378.67205      446.95978      -21.7  
 +-            0.13            0.024            0.035            0.2

Quartic distortion constants:  
 0.855065      -17.8190      190      0.15964      -0.993  
 +-      0.0043      0.020      fixed      0.018      fixed

Sextic distortion constants:  
 0 -0.14778      0      0      0      0      0  
 +-      fixed 0.014      fixed      fixed      fixed      fixed      fixed

Significant Digits and Correlation Matrix:

|   |       |        |       |        |        |        |
|---|-------|--------|-------|--------|--------|--------|
| 6 | 0.909 | -0.845 | 0.411 | 0.258  | -0.445 | 0.308  |
|   | 8     | -0.990 | 0.056 | -0.073 | -0.043 | 0.001  |
|   |       | 8      | 0.084 | 0.205  | -0.093 | 0.130  |
|   |       |        | 6     | 0.905  | -0.942 | 0.942  |
|   |       |        |       | 6      | -0.816 | 0.969  |
|   |       |        |       |        | 5      | -0.821 |
|   |       |        |       |        |        | 5      |

**Table 3S** Microwave spectrum of the first excited state of the lowest bending vibration of the *anticlinal* conformer of H<sub>2</sub>C=C=CH<sup>80</sup>SeCN

Total number of transitions: 139

| Transition |    |    |    |    | obs. frequency | obs.- calc. | weight | t    | distortion total | corrections higher | fixed  |        |
|------------|----|----|----|----|----------------|-------------|--------|------|------------------|--------------------|--------|--------|
| 19         | 5  | 14 | 20 | 5  | 15             | 49211.850   | 0.072  | 0.15 | 9.9              | -8.431             | -0.102 | -0.642 |
| 19         | 7  | 13 | 20 | 7  | 14             | 49028.020   | -0.279 | 0.10 | -1.7             | 7.770              | -0.207 | -0.650 |
| 19         | 7  | 12 | 20 | 7  | 13             | 49028.020   | -0.343 | 0.10 | -2.0             | 7.770              | -0.207 | -0.649 |
| 19         | 8  | 12 | 20 | 8  | 13             | 48996.700   | 0.236  | 0.10 | 1.5              | 17.431             | -0.271 | -0.547 |
| 19         | 8  | 11 | 20 | 8  | 12             | 48996.700   | 0.234  | 0.10 | 1.5              | 17.431             | -0.271 | -0.546 |
| 19         | 9  | 11 | 20 | 9  | 12             | 48979.280   | 0.051  | 0.25 | 0.1              | 28.281             | -0.344 | -0.423 |
| 19         | 9  | 10 | 20 | 9  | 11             | 48979.280   | 0.051  | 0.25 | 0.1              | 28.281             | -0.344 | -0.423 |
| 19         | 10 | 10 | 20 | 10 | 11             | 48971.270   | -0.104 | 0.20 | -0.3             | 40.349             | -0.425 | -0.280 |
| 19         | 10 | 9  | 20 | 10 | 10             | 48971.270   | -0.104 | 0.20 | -0.3             | 40.349             | -0.425 | -0.280 |
| 22         | 5  | 18 | 23 | 5  | 19             | 56639.690   | 0.014  | 0.20 | 9.9              | -18.837            | -0.155 | -1.516 |
| 22         | 6  | 17 | 23 | 6  | 18             | 56526.190   | 0.341  | 0.12 | 2.0              | -10.225            | -0.227 | -1.227 |
| 22         | 6  | 16 | 23 | 6  | 17             | 56535.200   | 0.246  | 0.12 | 1.7              | -10.315            | -0.226 | -1.128 |
| 22         | 8  | 15 | 23 | 8  | 16             | 56386.190   | -0.068 | 0.10 | -0.4             | 11.111             | -0.411 | -1.014 |
| 22         | 8  | 15 | 23 | 8  | 16             | 56386.190   | -0.068 | 0.10 | -0.4             | 11.111             | -0.411 | -1.014 |
| 22         | 8  | 14 | 23 | 8  | 15             | 56386.190   | -0.081 | 0.10 | -0.4             | 11.111             | -0.411 | -1.014 |
| 22         | 8  | 14 | 23 | 8  | 15             | 56386.190   | -0.081 | 0.10 | -0.4             | 11.111             | -0.411 | -1.014 |
| 22         | 9  | 14 | 23 | 9  | 15             | 56356.070   | 0.179  | 0.10 | 1.0              | 23.688             | -0.522 | -0.881 |
| 22         | 9  | 14 | 23 | 9  | 15             | 56356.070   | 0.179  | 0.10 | 1.0              | 23.688             | -0.522 | -0.881 |
| 22         | 9  | 13 | 23 | 9  | 14             | 56356.070   | 0.179  | 0.10 | 1.0              | 23.688             | -0.522 | -0.881 |
| 22         | 9  | 13 | 23 | 9  | 14             | 56356.070   | 0.179  | 0.10 | 1.0              | 23.688             | -0.522 | -0.881 |
| 22         | 10 | 13 | 23 | 10 | 14             | 56339.170   | -0.258 | 0.12 | -1.1             | 37.622             | -0.646 | -0.725 |
| 22         | 10 | 12 | 23 | 10 | 13             | 56339.170   | -0.258 | 0.12 | -1.1             | 37.622             | -0.646 | -0.725 |
| 22         | 14 | 9  | 23 | 14 | 10             | 56346.320   | -0.161 | 0.10 | -0.9             | 107.425            | -1.269 | 0.123  |
| 22         | 14 | 8  | 23 | 14 | 9              | 56346.320   | -0.161 | 0.10 | -0.9             | 107.425            | -1.269 | 0.123  |
| 22         | 15 | 8  | 23 | 15 | 9              | 56359.230   | 0.090  | 0.10 | 0.5              | 128.448            | -1.457 | 0.392  |
| 22         | 15 | 7  | 23 | 15 | 8              | 56359.230   | 0.090  | 0.10 | 0.5              | 128.448            | -1.457 | 0.392  |
| 22         | 16 | 7  | 23 | 16 | 8              | 56374.750   | -0.014 | 0.10 | -0.1             | 150.911            | -1.658 | 0.685  |
| 22         | 16 | 6  | 23 | 16 | 7              | 56374.750   | -0.014 | 0.10 | -0.1             | 150.911            | -1.658 | 0.685  |
| 23         | 6  | 18 | 24 | 6  | 19             | 59013.170   | 0.270  | 0.15 | 1.2              | -14.295            | -0.256 | -1.429 |
| 23         | 6  | 17 | 24 | 6  | 18             | 59027.450   | 0.112  | 0.20 | 0.3              | -14.464            | -0.255 | -1.273 |
| 23         | 8  | 16 | 24 | 8  | 17             | 58853.050   | -0.162 | 0.10 | -0.9             | 8.154              | -0.466 | -1.202 |
| 23         | 8  | 15 | 24 | 8  | 16             | 58853.050   | -0.186 | 0.10 | -1.0             | 8.154              | -0.466 | -1.202 |
| 23         | 9  | 15 | 24 | 9  | 16             | 58817.690   | 0.213  | 0.10 | 1.1              | 21.325             | -0.592 | -1.068 |
| 23         | 9  | 14 | 24 | 9  | 15             | 58817.690   | 0.212  | 0.10 | 1.1              | 21.325             | -0.592 | -1.068 |
| 24         | 8  | 17 | 25 | 8  | 18             | 61322.220   | 0.055  | 0.10 | 0.3              | 4.731              | -0.526 | -1.408 |
| 24         | 8  | 16 | 25 | 8  | 17             | 61322.220   | 0.010  | 0.10 | 0.1              | 4.731              | -0.526 | -1.407 |
| 24         | 9  | 16 | 25 | 9  | 17             | 61280.480   | -0.040 | 0.10 | -0.2             | 18.509             | -0.669 | -1.273 |
| 24         | 9  | 15 | 25 | 9  | 16             | 61280.480   | -0.041 | 0.10 | -0.2             | 18.509             | -0.669 | -1.273 |
| 24         | 10 | 15 | 25 | 10 | 16             | 61256.250   | -0.324 | 0.10 | -1.7             | 33.720             | -0.828 | -1.110 |
| 24         | 10 | 14 | 25 | 10 | 15             | 61256.250   | -0.324 | 0.10 | -1.7             | 33.720             | -0.828 | -1.110 |
| 24         | 11 | 14 | 25 | 11 | 15             | 61244.550   | 0.023  | 0.15 | 0.1              | 50.414             | -1.003 | -0.922 |
| 24         | 11 | 13 | 25 | 11 | 14             | 61244.550   | 0.023  | 0.15 | 0.1              | 50.414             | -1.003 | -0.922 |
| 24         | 12 | 13 | 25 | 12 | 14             | 61241.360   | 0.370  | 0.15 | 1.3              | 68.621             | -1.195 | -0.710 |
| 24         | 12 | 12 | 25 | 12 | 13             | 61241.360   | 0.370  | 0.15 | 1.3              | 68.621             | -1.195 | -0.710 |
| 24         | 14 | 11 | 25 | 14 | 12             | 61251.970   | 0.161  | 0.10 | 0.9              | 109.640            | -1.629 | -0.213 |
| 24         | 14 | 10 | 25 | 14 | 11             | 61251.970   | 0.161  | 0.10 | 0.9              | 109.640            | -1.629 | -0.213 |
| 24         | 15 | 10 | 25 | 15 | 11             | 61263.870   | -0.029 | 0.10 | -0.2             | 132.472            | -1.871 | 0.072  |
| 24         | 15 | 9  | 25 | 15 | 10             | 61263.870   | -0.029 | 0.10 | -0.2             | 132.472            | -1.871 | 0.072  |
| 25         | 8  | 18 | 26 | 8  | 19             | 63792.900   | -0.313 | 0.10 | -1.7             | 0.819              | -0.590 | -1.631 |
| 25         | 8  | 17 | 26 | 8  | 18             | 63792.900   | -0.395 | 0.10 | -2.1             | 0.818              | -0.590 | -1.628 |
| 25         | 9  | 17 | 26 | 9  | 18             | 63744.970   | -0.115 | 0.10 | -0.6             | 15.217             | -0.751 | -1.496 |
| 25         | 9  | 16 | 26 | 9  | 17             | 63744.970   | -0.118 | 0.10 | -0.6             | 15.217             | -0.751 | -1.496 |

|    |    |    |    |    |    |           |        |      |      |         |        |         |
|----|----|----|----|----|----|-----------|--------|------|------|---------|--------|---------|
| 25 | 10 | 16 | 26 | 10 | 17 | 63716.600 | -0.218 | 0.10 | -1.1 | 31.079  | -0.930 | -1.332  |
| 25 | 10 | 15 | 26 | 10 | 16 | 63716.600 | -0.218 | 0.10 | -1.1 | 31.079  | -0.930 | -1.332  |
| 25 | 11 | 15 | 26 | 11 | 16 | 63702.200 | 0.364  | 0.10 | 1.9  | 48.466  | -1.128 | -1.140  |
| 25 | 11 | 14 | 26 | 11 | 15 | 63702.200 | 0.364  | 0.10 | 1.9  | 48.466  | -1.128 | -1.140  |
| 25 | 12 | 14 | 26 | 12 | 15 | 63696.630 | 0.323  | 0.20 | 0.8  | 67.415  | -1.344 | -0.923  |
| 25 | 12 | 13 | 26 | 12 | 14 | 63696.630 | 0.323  | 0.20 | 0.8  | 67.415  | -1.344 | -0.923  |
| 25 | 13 | 13 | 26 | 13 | 14 | 63697.710 | -0.155 | 0.20 | -0.4 | 87.946  | -1.579 | -0.681  |
| 25 | 13 | 12 | 26 | 13 | 13 | 63697.710 | -0.155 | 0.20 | -0.4 | 87.946  | -1.579 | -0.681  |
| 25 | 14 | 12 | 26 | 14 | 13 | 63705.040 | 0.057  | 0.12 | 0.2  | 110.075 | -1.832 | -0.413  |
| 25 | 14 | 11 | 26 | 14 | 12 | 63705.040 | 0.057  | 0.12 | 0.2  | 110.075 | -1.832 | -0.413  |
| 25 | 16 | 10 | 26 | 16 | 11 | 63731.920 | -0.192 | 0.10 | -1.1 | 159.166 | -2.395 | 0.201   |
| 25 | 16 | 9  | 26 | 16 | 10 | 63731.920 | -0.192 | 0.10 | -1.1 | 159.166 | -2.395 | 0.201   |
| 26 | 7  | 19 | 27 | 7  | 20 | 66359.840 | -0.090 | 0.20 | -0.2 | -17.328 | -0.499 | -1.919  |
| 26 | 8  | 19 | 27 | 8  | 20 | 66266.400 | -0.053 | 0.15 | -0.2 | -3.610  | -0.660 | -1.871  |
| 26 | 8  | 18 | 27 | 8  | 19 | 66266.400 | -0.199 | 0.15 | -0.7 | -3.611  | -0.660 | -1.867  |
| 26 | 9  | 18 | 27 | 9  | 19 | 66211.350 | 0.110  | 0.10 | 0.6  | 11.425  | -0.840 | -1.739  |
| 26 | 9  | 17 | 27 | 9  | 18 | 66211.350 | 0.105  | 0.10 | 0.5  | 11.424  | -0.840 | -1.739  |
| 26 | 10 | 17 | 27 | 10 | 18 | 66178.350 | 0.112  | 0.25 | 0.2  | 27.948  | -1.041 | -1.573  |
| 26 | 10 | 16 | 27 | 10 | 17 | 66178.350 | 0.111  | 0.25 | 0.2  | 27.948  | -1.041 | -1.573  |
| 26 | 12 | 15 | 27 | 12 | 16 | 66152.500 | 0.215  | 0.15 | 0.7  | 65.729  | -1.505 | -1.157  |
| 26 | 12 | 14 | 27 | 12 | 15 | 66152.500 | 0.215  | 0.15 | 0.7  | 65.729  | -1.505 | -1.157  |
| 26 | 13 | 14 | 27 | 13 | 15 | 66152.500 | 0.147  | 0.15 | 0.5  | 87.057  | -1.767 | -0.909  |
| 26 | 13 | 13 | 27 | 13 | 14 | 66152.500 | 0.147  | 0.15 | 0.5  | 87.057  | -1.767 | -0.909  |
| 26 | 16 | 11 | 27 | 16 | 12 | 66184.840 | -0.036 | 0.10 | -0.2 | 160.994 | -2.681 | -5.2E-3 |
| 26 | 16 | 10 | 27 | 16 | 11 | 66184.840 | -0.036 | 0.10 | -0.2 | 160.994 | -2.681 | -5.2E-3 |
| 27 | 7  | 21 | 28 | 7  | 22 | 68843.850 | 0.226  | 0.15 | 0.8  | -22.901 | -0.554 | -2.238  |
| 27 | 7  | 20 | 28 | 7  | 21 | 68848.720 | -0.139 | 0.15 | -0.5 | -22.994 | -0.553 | -2.144  |
| 27 | 9  | 19 | 28 | 9  | 20 | 68678.750 | -0.304 | 0.10 | -1.6 | 7.108   | -0.935 | -2.000  |
| 27 | 9  | 18 | 28 | 9  | 19 | 68678.750 | -0.313 | 0.10 | -1.6 | 7.108   | -0.935 | -2.000  |
| 27 | 10 | 18 | 28 | 10 | 19 | 68641.220 | 0.336  | 0.12 | 1.4  | 24.305  | -1.160 | -1.835  |
| 27 | 10 | 17 | 28 | 10 | 18 | 68641.220 | 0.336  | 0.12 | 1.4  | 24.305  | -1.160 | -1.835  |
| 27 | 14 | 14 | 28 | 14 | 15 | 68612.590 | 0.173  | 0.10 | 0.9  | 109.502 | -2.287 | -0.879  |
| 27 | 14 | 13 | 28 | 14 | 14 | 68612.590 | 0.173  | 0.10 | 0.9  | 109.502 | -2.287 | -0.879  |
| 27 | 15 | 13 | 28 | 15 | 14 | 68623.020 | 0.155  | 0.10 | 0.8  | 135.051 | -2.627 | -0.571  |
| 27 | 15 | 12 | 28 | 15 | 13 | 68623.020 | 0.155  | 0.10 | 0.8  | 135.051 | -2.627 | -0.571  |
| 27 | 16 | 12 | 28 | 16 | 13 | 68637.600 | -0.206 | 0.12 | -0.9 | 162.329 | -2.990 | -0.235  |
| 27 | 16 | 11 | 28 | 16 | 12 | 68637.600 | -0.206 | 0.12 | -0.9 | 162.329 | -2.990 | -0.235  |
| 28 | 7  | 22 | 29 | 7  | 23 | 71333.830 | 0.100  | 0.20 | 0.3  | -29.119 | -0.612 | -2.519  |
| 28 | 7  | 21 | 29 | 7  | 22 | 71342.050 | 0.131  | 0.20 | 0.4  | -29.285 | -0.611 | -2.373  |
| 28 | 9  | 20 | 29 | 9  | 21 | 71148.570 | -0.028 | 0.10 | -0.1 | 2.243   | -1.037 | -2.281  |
| 28 | 9  | 19 | 29 | 9  | 20 | 71148.570 | -0.044 | 0.10 | -0.2 | 2.243   | -1.037 | -2.281  |
| 28 | 10 | 19 | 29 | 10 | 20 | 71105.020 | 0.217  | 0.12 | 0.9  | 20.126  | -1.287 | -2.117  |
| 28 | 10 | 18 | 29 | 10 | 19 | 71105.020 | 0.216  | 0.12 | 0.9  | 20.126  | -1.287 | -2.117  |
| 28 | 11 | 18 | 29 | 11 | 19 | 71079.240 | 0.049  | 0.10 | 0.3  | 39.637  | -1.562 | -1.918  |
| 28 | 11 | 17 | 29 | 11 | 18 | 71079.240 | 0.049  | 0.10 | 0.3  | 39.637  | -1.562 | -1.918  |
| 28 | 12 | 17 | 29 | 12 | 18 | 71066.410 | 0.087  | 0.12 | 0.4  | 60.839  | -1.862 | -1.690  |
| 28 | 12 | 16 | 29 | 12 | 17 | 71066.410 | 0.087  | 0.12 | 0.4  | 60.839  | -1.862 | -1.690  |
| 28 | 13 | 16 | 29 | 13 | 17 | 71062.690 | -0.184 | 0.10 | -1.0 | 83.769  | -2.188 | -1.433  |
| 28 | 13 | 15 | 29 | 13 | 16 | 71062.690 | -0.184 | 0.10 | -1.0 | 83.769  | -2.188 | -1.433  |
| 28 | 15 | 14 | 29 | 15 | 15 | 71076.380 | 0.005  | 0.12 | 0.0  | 134.909 | -2.918 | -0.833  |
| 28 | 15 | 13 | 29 | 15 | 14 | 71076.380 | 0.005  | 0.12 | 0.0  | 134.909 | -2.918 | -0.833  |
| 28 | 16 | 13 | 29 | 16 | 14 | 71090.770 | -0.136 | 0.10 | -0.8 | 163.149 | -3.321 | -0.489  |
| 28 | 16 | 12 | 29 | 16 | 13 | 71090.770 | -0.136 | 0.10 | -0.8 | 163.149 | -3.321 | -0.489  |
| 29 | 7  | 23 | 30 | 7  | 24 | 73827.140 | 0.158  | 0.15 | 0.8  | -35.957 | -0.674 | -2.824  |
| 29 | 7  | 22 | 30 | 7  | 23 | 73839.450 | -0.110 | 0.10 | 9.9  | -36.243 | -0.672 | -2.600  |
| 29 | 9  | 21 | 30 | 9  | 22 | 73619.850 | -0.096 | 0.10 | -0.5 | -3.197  | -1.146 | -2.582  |
| 29 | 9  | 20 | 30 | 9  | 21 | 73619.850 | -0.125 | 0.10 | -0.7 | -3.197  | -1.146 | -2.581  |
| 29 | 10 | 20 | 30 | 10 | 21 | 73570.160 | 0.113  | 0.10 | 0.6  | 15.389  | -1.423 | -2.420  |
| 29 | 10 | 19 | 30 | 10 | 20 | 73570.160 | 0.112  | 0.10 | 0.6  | 15.389  | -1.423 | -2.420  |
| 29 | 11 | 19 | 30 | 11 | 20 | 73540.190 | -0.043 | 0.10 | -0.2 | 35.626  | -1.727 | -2.222  |
| 29 | 11 | 18 | 30 | 11 | 19 | 73540.190 | -0.043 | 0.10 | -0.2 | 35.626  | -1.727 | -2.222  |
| 29 | 12 | 18 | 30 | 12 | 19 | 73524.420 | -0.014 | 0.10 | -0.1 | 57.591  | -2.060 | -1.990  |

|    |    |    |    |    |    |           |        |      |      |         |        |        |
|----|----|----|----|----|----|-----------|--------|------|------|---------|--------|--------|
| 29 | 12 | 18 | 30 | 12 | 19 | 73524.420 | -0.014 | 0.10 | -0.1 | 57.591  | -2.060 | -1.990 |
| 29 | 12 | 17 | 30 | 12 | 18 | 73524.420 | -0.014 | 0.10 | -0.1 | 57.591  | -2.060 | -1.990 |
| 29 | 12 | 17 | 30 | 12 | 18 | 73524.420 | -0.014 | 0.10 | -0.1 | 57.591  | -2.060 | -1.990 |
| 29 | 13 | 17 | 30 | 13 | 18 | 73519.050 | 0.107  | 0.15 | 0.4  | 81.329  | -2.421 | -1.729 |
| 29 | 13 | 16 | 30 | 13 | 17 | 73519.050 | 0.107  | 0.15 | 0.4  | 81.329  | -2.421 | -1.729 |
| 29 | 15 | 15 | 30 | 15 | 16 | 73530.400 | 0.240  | 0.10 | 1.3  | 134.234 | -3.229 | -1.119 |
| 29 | 15 | 14 | 30 | 15 | 15 | 73530.400 | 0.240  | 0.10 | 1.3  | 134.234 | -3.229 | -1.119 |
| 29 | 16 | 14 | 30 | 16 | 15 | 73544.050 | -0.132 | 0.10 | -0.8 | 163.436 | -3.676 | -0.769 |
| 29 | 16 | 13 | 30 | 16 | 14 | 73544.050 | -0.132 | 0.10 | -0.8 | 163.436 | -3.676 | -0.769 |
| 30 | 7  | 24 | 31 | 7  | 25 | 76323.460 | 0.113  | 0.20 | 0.4  | -43.440 | -0.739 | -3.155 |
| 30 | 7  | 23 | 31 | 7  | 24 | 76342.470 | 0.131  | 0.15 | 9.9  | -43.921 | -0.736 | -2.818 |
| 30 | 9  | 22 | 31 | 9  | 23 | 76093.450 | 0.276  | 0.15 | 1.0  | -9.237  | -1.262 | -2.903 |
| 30 | 9  | 21 | 31 | 9  | 22 | 76093.450 | 0.225  | 0.15 | 0.8  | -9.238  | -1.262 | -2.901 |
| 30 | 10 | 21 | 31 | 10 | 22 | 76036.530 | -0.136 | 0.10 | -0.7 | 10.068  | -1.568 | -2.745 |
| 30 | 10 | 20 | 31 | 10 | 21 | 76036.530 | -0.137 | 0.10 | -0.8 | 10.068  | -1.568 | -2.745 |
| 30 | 11 | 20 | 31 | 11 | 21 | 76002.160 | -0.137 | 0.10 | -0.7 | 31.043  | -1.904 | -2.547 |
| 30 | 11 | 19 | 31 | 11 | 20 | 76002.160 | -0.137 | 0.10 | -0.7 | 31.043  | -1.904 | -2.547 |
| 31 | 9  | 23 | 32 | 9  | 24 | 78568.490 | 0.131  | 0.10 | 0.9  | -15.906 | -1.385 | -3.244 |
| 31 | 9  | 22 | 32 | 9  | 23 | 78568.490 | 0.043  | 0.10 | 0.3  | -15.908 | -1.384 | -3.240 |
| 31 | 11 | 21 | 32 | 11 | 22 | 78465.270 | -0.149 | 0.10 | -0.8 | 25.865  | -2.092 | -2.896 |
| 31 | 11 | 20 | 32 | 11 | 21 | 78465.270 | -0.149 | 0.10 | -0.8 | 25.865  | -2.092 | -2.896 |
| 31 | 12 | 20 | 32 | 12 | 21 | 78443.040 | 0.075  | 0.10 | 0.4  | 49.380  | -2.497 | -2.663 |
| 31 | 12 | 19 | 32 | 12 | 20 | 78443.040 | 0.075  | 0.10 | 0.4  | 49.380  | -2.497 | -2.663 |
| 31 | 16 | 16 | 32 | 16 | 17 | 78451.310 | 0.029  | 0.10 | 0.4  | 162.328 | -4.459 | -1.406 |
| 31 | 16 | 15 | 32 | 16 | 16 | 78451.310 | 0.029  | 0.10 | 0.4  | 162.328 | -4.459 | -1.406 |

rms deviation: 1.6092 time (sec):

Rotational constants (MHz) and kappa:

|    |         |           |           |          |
|----|---------|-----------|-----------|----------|
|    | 5637.51 | 1316.2496 | 1125.0842 | -0.91527 |
| +- | 14      | 0.16      | 0.17      | 0.00014  |

Inertial constants and defect ( $\text{u}\text{\AA}^2$ ):

|    |         |           |           |       |
|----|---------|-----------|-----------|-------|
|    | 89.6457 | 383.95383 | 449.19223 | -24.4 |
| +- | 0.23    | 0.048     | 0.068     | 0.3   |

Quartic distortion constants:

|    |          |          |       |         |        |
|----|----------|----------|-------|---------|--------|
|    | 0.654873 | -15.6476 | 190   | 0.13438 | -0.993 |
| +- | 0.0056   | 0.031    | fixed | 0.022   | fixed  |

Sextic distortion constants:

|    |       |          |       |       |       |       |       |
|----|-------|----------|-------|-------|-------|-------|-------|
|    | 0     | -0.13320 | 0     | 0     | 0     | 0     | 0     |
| +- | fixed | 0.021    | fixed | fixed | fixed | fixed | fixed |

Significant Digits and Correlation Matrix:

|   |       |        |        |        |        |        |
|---|-------|--------|--------|--------|--------|--------|
| 6 | 0.961 | -0.934 | 0.107  | -0.091 | -0.056 | 0.025  |
|   | 8     | -0.996 | -0.131 | -0.286 | 0.213  | -0.167 |
|   |       | 8      | 0.217  | 0.363  | -0.294 | 0.247  |
|   |       |        | 6      | 0.841  | -0.936 | 0.911  |
|   |       |        |        | 6      | -0.738 | 0.959  |
|   |       |        |        |        | 5      | -0.773 |
|   |       |        |        |        |        | 5      |



**Table 4S** Microwave spectrum of the ground vibrational state of the *anticlinal* conformer of H<sub>2</sub>C=C=CH<sup>78</sup>SeCN

Total number of transitions: 62

| Transition |    |    |    |    | obs. frequency | obs.-<br>calc. | weight | t    | distortion | corrections |        |        |
|------------|----|----|----|----|----------------|----------------|--------|------|------------|-------------|--------|--------|
|            |    |    |    |    |                |                |        |      | total      | higher      | fixed  |        |
| 19         | 7  | 13 | 20 | 7  | 14             | 49383.190      | 0.126  | 0.10 | 1.1        | 6.865       | -0.422 | -1.878 |
| 19         | 7  | 12 | 20 | 7  | 13             | 49383.190      | 0.044  | 0.10 | 0.4        | 6.865       | -0.422 | -1.877 |
| 19         | 8  | 12 | 20 | 8  | 13             | 49349.470      | -0.001 | 0.10 | -0.0       | 17.209      | -0.554 | -1.514 |
| 19         | 8  | 11 | 20 | 8  | 12             | 49349.470      | -0.003 | 0.10 | -0.0       | 17.209      | -0.554 | -1.514 |
| 19         | 10 | 10 | 20 | 10 | 11             | 49323.120      | 0.054  | 0.10 | 0.5        | 41.615      | -0.868 | -0.933 |
| 19         | 10 | 9  | 20 | 10 | 10             | 49323.120      | 0.054  | 0.10 | 0.5        | 41.615      | -0.868 | -0.933 |
| 20         | 7  | 14 | 21 | 7  | 15             | 51868.950      | -0.223 | 0.10 | -2.0       | 4.212       | -0.488 | -2.341 |
| 20         | 7  | 13 | 21 | 7  | 14             | 51868.950      | -0.381 | 0.10 | -3.4       | 4.210       | -0.488 | -2.341 |
| 20         | 8  | 13 | 21 | 8  | 14             | 51829.110      | -0.001 | 0.15 | -0.0       | 15.136      | -0.640 | -1.905 |
| 20         | 8  | 12 | 21 | 8  | 13             | 51829.110      | -0.005 | 0.15 | -0.0       | 15.136      | -0.640 | -1.905 |
| 20         | 9  | 12 | 21 | 9  | 13             | 51806.900      | 0.078  | 0.15 | 0.4        | 27.318      | -0.812 | -1.550 |
| 20         | 9  | 11 | 21 | 9  | 12             | 51806.900      | 0.078  | 0.15 | 0.4        | 27.318      | -0.812 | -1.550 |
| 20         | 14 | 7  | 21 | 14 | 8              | 51812.800      | -0.203 | 0.15 | -1.4       | 108.420     | -1.973 | -0.048 |
| 20         | 14 | 6  | 21 | 14 | 7              | 51812.800      | -0.203 | 0.15 | -1.4       | 108.420     | -1.973 | -0.048 |
| 22         | 8  | 15 | 23 | 8  | 16             | 56794.060      | 0.208  | 0.10 | 1.7        | 9.593       | -0.839 | -2.891 |
| 22         | 8  | 14 | 23 | 8  | 15             | 56794.060      | 0.191  | 0.10 | 1.6        | 9.592       | -0.839 | -2.890 |
| 22         | 9  | 14 | 23 | 9  | 15             | 56761.840      | 0.018  | 0.10 | 0.1        | 23.038      | -1.065 | -2.403 |
| 22         | 9  | 13 | 23 | 9  | 14             | 56761.840      | 0.017  | 0.10 | 0.1        | 23.038      | -1.065 | -2.403 |
| 22         | 10 | 13 | 23 | 10 | 14             | 56744.700      | 0.216  | 0.15 | 1.1        | 37.876      | -1.318 | -1.991 |
| 22         | 10 | 13 | 23 | 10 | 14             | 56744.700      | 0.216  | 0.15 | 1.1        | 37.876      | -1.318 | -1.991 |
| 22         | 13 | 10 | 23 | 13 | 11             | 56742.400      | 0.053  | 0.15 | 0.3        | 91.151      | -2.233 | -0.915 |
| 22         | 13 | 9  | 23 | 13 | 10             | 56742.400      | 0.053  | 0.15 | 0.3        | 91.151      | -2.233 | -0.915 |
| 23         | 9  | 15 | 24 | 9  | 16             | 59241.390      | -0.050 | 0.20 | -0.2       | 20.165      | -1.209 | -2.930 |
| 23         | 9  | 14 | 24 | 9  | 15             | 59241.390      | -0.051 | 0.20 | -0.2       | 20.165      | -1.209 | -2.930 |
| 24         | 8  | 17 | 25 | 8  | 18             | 61766.720      | 0.223  | 0.12 | 1.5        | 1.995       | -1.073 | -4.201 |
| 24         | 8  | 16 | 25 | 8  | 17             | 61766.720      | 0.163  | 0.12 | 1.1        | 1.994       | -1.073 | -4.201 |
| 24         | 9  | 16 | 25 | 9  | 17             | 61722.520      | -0.036 | 0.15 | -0.2       | 16.766      | -1.365 | -3.531 |
| 24         | 9  | 15 | 25 | 9  | 16             | 61722.520      | -0.038 | 0.15 | -0.2       | 16.766      | -1.365 | -3.531 |
| 24         | 12 | 13 | 25 | 12 | 14             | 61680.800      | -0.132 | 0.15 | -0.7       | 70.034      | -2.440 | -2.076 |
| 24         | 12 | 12 | 25 | 12 | 13             | 61680.800      | -0.132 | 0.15 | -0.7       | 70.034      | -2.440 | -2.076 |
| 24         | 13 | 12 | 25 | 13 | 13             | 61684.090      | 0.091  | 0.20 | 0.4        | 90.940      | -2.866 | -1.659 |
| 24         | 13 | 11 | 25 | 13 | 12             | 61684.090      | 0.091  | 0.20 | 0.4        | 90.940      | -2.866 | -1.659 |
| 25         | 9  | 17 | 26 | 9  | 18             | 64205.000      | -0.238 | 0.10 | -1.9       | 12.814      | -1.533 | -4.217 |
| 25         | 9  | 16 | 26 | 9  | 17             | 64205.000      | -0.241 | 0.10 | -1.9       | 12.814      | -1.533 | -4.216 |
| 25         | 10 | 16 | 26 | 10 | 17             | 64175.400      | -0.032 | 0.10 | -0.3       | 29.741      | -1.899 | -3.589 |
| 25         | 10 | 15 | 26 | 10 | 16             | 64175.400      | -0.032 | 0.10 | -0.3       | 29.741      | -1.899 | -3.589 |
| 26         | 9  | 18 | 27 | 9  | 19             | 66689.750      | 0.197  | 0.20 | 0.8        | 8.278       | -1.714 | -4.993 |
| 26         | 9  | 17 | 27 | 9  | 18             | 66689.750      | 0.190  | 0.20 | 0.7        | 8.278       | -1.714 | -4.993 |
| 26         | 11 | 16 | 27 | 11 | 17             | 66635.660      | 0.106  | 0.15 | 0.6        | 45.164      | -2.577 | -3.661 |
| 26         | 11 | 15 | 27 | 11 | 16             | 66635.660      | 0.106  | 0.15 | 0.6        | 45.164      | -2.577 | -3.661 |
| 26         | 12 | 15 | 27 | 12 | 16             | 66627.570      | 0.168  | 0.15 | 0.9        | 66.050      | -3.071 | -3.120 |
| 26         | 12 | 14 | 27 | 12 | 15             | 66627.570      | 0.168  | 0.15 | 0.9        | 66.050      | -3.071 | -3.120 |
| 26         | 13 | 14 | 27 | 13 | 15             | 66627.570      | 0.086  | 0.15 | 0.5        | 88.628      | -3.608 | -2.618 |
| 26         | 13 | 13 | 27 | 13 | 14             | 66627.570      | 0.086  | 0.15 | 0.5        | 88.628      | -3.608 | -2.618 |
| 26         | 15 | 12 | 27 | 15 | 13             | 66645.870      | 0.167  | 0.12 | 1.4        | 138.962     | -4.810 | -1.658 |
| 26         | 15 | 11 | 27 | 15 | 12             | 66645.870      | 0.167  | 0.12 | 1.4        | 138.962     | -4.810 | -1.658 |
| 26         | 16 | 11 | 27 | 16 | 12             | 66661.620      | -0.170 | 0.20 | -0.8       | 166.750     | -5.474 | -1.178 |
| 26         | 16 | 10 | 27 | 16 | 11             | 66661.620      | -0.170 | 0.20 | -0.8       | 166.750     | -5.474 | -1.178 |
| 27         | 10 | 18 | 28 | 10 | 19             | 69135.190      | -0.120 | 0.12 | -0.8       | 21.522      | -2.367 | -5.038 |
| 27         | 10 | 17 | 28 | 10 | 18             | 69135.190      | -0.121 | 0.12 | -0.8       | 21.522      | -2.367 | -5.038 |
| 27         | 12 | 16 | 28 | 12 | 17             | 69101.350      | -0.292 | 0.12 | -2.1       | 63.204      | -3.423 | -3.742 |
| 27         | 12 | 15 | 28 | 12 | 16             | 69101.350      | -0.292 | 0.12 | -2.1       | 63.204      | -3.423 | -3.742 |

|    |    |    |    |    |    |           |        |      |      |         |        |         |
|----|----|----|----|----|----|-----------|--------|------|------|---------|--------|---------|
| 28 | 9  | 20 | 29 | 9  | 21 | 71663.270 | -0.097 | 0.15 | -0.5 | -2.664  | -2.116 | -6.859  |
| 28 | 9  | 19 | 29 | 9  | 20 | 71663.270 | -0.119 | 0.15 | -0.6 | -2.665  | -2.116 | -6.859  |
| 28 | 10 | 19 | 29 | 10 | 20 | 71617.280 | 0.114  | 0.10 | 0.9  | 16.490  | -2.626 | -5.899  |
| 28 | 10 | 18 | 29 | 10 | 19 | 71617.280 | 0.113  | 0.10 | 0.9  | 16.490  | -2.626 | -5.899  |
| 29 | 9  | 21 | 30 | 9  | 22 | 74153.020 | 0.009  | 0.12 | 0.1  | -9.135  | -2.337 | -7.968  |
| 29 | 9  | 20 | 30 | 9  | 21 | 74153.020 | -0.031 | 0.12 | -0.2 | -9.136  | -2.337 | -7.968  |
| 31 | 9  | 23 | 32 | 9  | 24 | 79138.300 | 0.141  | 0.10 | 1.4  | -24.240 | -2.822 | -10.594 |
| 31 | 9  | 22 | 32 | 9  | 23 | 79138.300 | 0.021  | 0.10 | 0.2  | -24.245 | -2.822 | -10.595 |
| 31 | 10 | 22 | 32 | 10 | 23 | 79070.940 | -0.063 | 0.12 | -0.5 | -2.647  | -3.512 | -9.134  |
| 31 | 10 | 21 | 32 | 10 | 22 | 79070.940 | -0.068 | 0.12 | -0.5 | -2.647  | -3.512 | -9.134  |

rms deviation: 1.2503

Rotational constants (MHz) and kappa:

|    |        |           |           |          |
|----|--------|-----------|-----------|----------|
|    | 5536.2 | 1326.3581 | 1132.1943 | -0.91182 |
| +- | fixed  | 0.038     | 0.044     | 0.00004  |

Inertial constants and defect (uÅ\*\*2):

|    |        |           |           |        |
|----|--------|-----------|-----------|--------|
|    | 91.286 | 381.02762 | 446.37133 | -25.94 |
| +- | fixed  | 0.011     | 0.017     | 0.03   |

Quartic distortion constants:

|    |          |         |       |       |        |
|----|----------|---------|-------|-------|--------|
|    | 0.720042 | -16.679 | 190   | 0.229 | -0.993 |
| +- | 0.0040   | 0.054   | fixed | fixed | fixed  |

Sextic and higher distortion constants:

|    |       |          |       |       |       |       |       |
|----|-------|----------|-------|-------|-------|-------|-------|
|    | 0     | -0.27198 | 0     | 0     | 0     | 0     | 0     |
| +- | fixed | 0.037    | fixed | fixed | fixed | fixed | fixed |

Significant Digits and Correlation Matrix:

|   |        |        |        |       |
|---|--------|--------|--------|-------|
| 8 | -0.977 | 0.640  | -0.288 | 0.121 |
|   | 8      | -0.466 | 0.476  | 0.079 |
|   |        | 6      | 0.502  | 0.803 |
|   |        |        | 5      | 0.901 |
|   |        |        |        | 5     |

**Table 5S** Microwave spectrum of the ground vibrational state of *synclinal* conformer of  $C_3H_5^{80}SeCN$

Total number of transitions: 161

| Transition |    |   |    |    | obs. frequency | obs.- weight |        | t    | distortion corrections |         |        |
|------------|----|---|----|----|----------------|--------------|--------|------|------------------------|---------|--------|
|            |    |   |    |    |                | calc.        |        |      | total                  | fixed   |        |
| 11         | 8  | 4 | 12 | 8  | 5              | 38248.560    | -0.138 | 0.15 | -0.5                   | 5.134   | -0.532 |
| 11         | 8  | 3 | 12 | 8  | 4              | 38248.560    | -0.157 | 0.15 | -0.6                   | 5.134   | -0.532 |
| 11         | 9  | 3 | 12 | 9  | 4              | 38189.244    | 0.201  | 0.30 | 0.4                    | 9.300   | -0.337 |
| 11         | 9  | 2 | 12 | 9  | 3              | 38189.244    | 0.200  | 0.30 | 0.4                    | 9.300   | -0.337 |
| 11         | 10 | 2 | 12 | 10 | 3              | 38148.600    | 0.137  | 0.15 | 0.5                    | 13.897  | -0.157 |
| 11         | 10 | 1 | 12 | 10 | 2              | 38148.600    | 0.137  | 0.15 | 0.5                    | 13.897  | -0.157 |
| 12         | 6  | 7 | 13 | 6  | 8              | 41780.650    | -0.172 | 0.20 | -0.5                   | -4.398  | -1.529 |
| 12         | 6  | 6 | 13 | 6  | 7              | 41823.390    | -0.080 | 0.30 | -0.2                   | -4.623  | -1.607 |
| 12         | 8  | 5 | 13 | 8  | 6              | 41490.950    | 0.066  | 0.10 | 0.4                    | 3.528   | -0.846 |
| 12         | 8  | 4 | 13 | 8  | 5              | 41490.950    | -0.008 | 0.10 | -0.0                   | 3.528   | -0.846 |
| 12         | 9  | 4 | 13 | 9  | 5              | 41413.950    | 0.040  | 0.10 | 0.2                    | 8.101   | -0.597 |
| 12         | 9  | 3 | 13 | 9  | 4              | 41413.950    | 0.038  | 0.10 | 0.2                    | 8.101   | -0.597 |
| 12         | 10 | 3 | 13 | 10 | 4              | 41361.370    | 0.045  | 0.10 | 0.3                    | 13.123  | -0.375 |
| 12         | 10 | 2 | 13 | 10 | 3              | 41361.370    | 0.045  | 0.10 | 0.3                    | 13.123  | -0.375 |
| 12         | 11 | 2 | 13 | 11 | 3              | 41324.700    | 0.173  | 0.20 | 0.5                    | 18.618  | -0.166 |
| 12         | 11 | 1 | 13 | 11 | 2              | 41324.935    | 0.408  | 0.20 | 1.2                    | 18.618  | -0.166 |
| 13         | 9  | 5 | 14 | 9  | 6              | 44649.380    | 0.238  | 0.10 | 1.4                    | 6.386   | -0.940 |
| 13         | 9  | 4 | 14 | 9  | 5              | 44649.380    | 0.231  | 0.10 | 1.4                    | 6.386   | -0.940 |
| 13         | 11 | 3 | 14 | 11 | 4              | 44535.590    | 0.203  | 0.10 | 1.2                    | 17.811  | -0.412 |
| 13         | 11 | 2 | 14 | 11 | 3              | 44535.590    | 0.203  | 0.10 | 1.2                    | 17.811  | -0.412 |
| 13         | 12 | 2 | 14 | 12 | 3              | 44501.720    | -0.107 | 0.15 | -0.4                   | 24.283  | -0.171 |
| 13         | 12 | 1 | 14 | 12 | 2              | 44501.720    | -0.107 | 0.15 | -0.4                   | 24.283  | -0.171 |
| 14         | 9  | 6 | 15 | 9  | 7              | 47895.550    | -0.116 | 0.10 | -0.7                   | 4.098   | -1.383 |
| 14         | 9  | 5 | 15 | 9  | 6              | 47895.550    | -0.142 | 0.10 | -0.8                   | 4.098   | -1.383 |
| 14         | 11 | 4 | 15 | 11 | 5              | 47753.280    | -0.135 | 0.10 | -0.8                   | 16.471  | -0.733 |
| 14         | 11 | 3 | 15 | 11 | 4              | 47753.280    | -0.135 | 0.10 | -0.8                   | 16.471  | -0.733 |
| 14         | 13 | 2 | 15 | 13 | 3              | 47680.280    | -0.095 | 0.20 | -0.3                   | 30.976  | -0.171 |
| 14         | 13 | 1 | 15 | 13 | 2              | 47680.280    | -0.095 | 0.20 | -0.3                   | 30.976  | -0.171 |
| 14         | 14 | 1 | 15 | 14 | 2              | 47658.090    | -0.154 | 0.15 | -0.6                   | 39.070  | 0.104  |
| 14         | 14 | 0 | 15 | 14 | 1              | 47658.090    | -0.154 | 0.15 | -0.6                   | 39.070  | 0.104  |
| 15         | 7  | 8 | 16 | 7  | 9              | 51557.340    | -0.228 | 0.20 | -0.7                   | -10.728 | -3.278 |
| 15         | 9  | 7 | 16 | 9  | 8              | 51154.030    | -0.436 | 0.10 | -2.6                   | 1.176   | -1.945 |
| 15         | 9  | 6 | 16 | 9  | 7              | 51154.030    | -0.523 | 0.10 | -3.1                   | 1.175   | -1.945 |
| 15         | 12 | 4 | 16 | 12 | 5              | 50926.720    | 0.083  | 0.10 | 0.5                    | 22.045  | -0.802 |
| 15         | 12 | 3 | 16 | 12 | 4              | 50926.720    | 0.083  | 0.10 | 0.5                    | 22.045  | -0.802 |
| 16         | 8  | 9 | 17 | 8  | 10             | 54608.000    | 0.175  | 0.20 | 0.5                    | -8.995  | -3.336 |
| 16         | 8  | 8 | 17 | 8  | 9              | 54613.600    | 0.165  | 0.20 | 0.5                    | -9.058  | -3.354 |
| 16         | 9  | 8 | 17 | 9  | 9              | 54426.340    | -0.252 | 0.10 | -1.5                   | -2.447  | -2.650 |
| 16         | 9  | 7 | 17 | 9  | 8              | 54426.340    | -0.519 | 0.10 | -3.1                   | -2.450  | -2.650 |
| 16         | 12 | 5 | 17 | 12 | 6              | 54148.970    | -0.040 | 0.10 | -0.2                   | 20.026  | -1.247 |
| 16         | 12 | 4 | 17 | 12 | 5              | 54148.970    | -0.040 | 0.10 | -0.2                   | 20.026  | -1.247 |
| 16         | 13 | 4 | 17 | 13 | 5              | 54101.610    | -0.198 | 0.10 | -1.2                   | 28.657  | -0.871 |
| 16         | 13 | 3 | 17 | 13 | 4              | 54101.610    | -0.198 | 0.10 | -1.2                   | 28.657  | -0.871 |
| 16         | 14 | 3 | 17 | 14 | 4              | 54067.280    | 0.326  | 0.25 | 0.8                    | 37.907  | -0.510 |
| 16         | 14 | 2 | 17 | 14 | 3              | 54067.280    | 0.326  | 0.25 | 0.8                    | 37.907  | -0.510 |
| 16         | 16 | 1 | 17 | 16 | 2              | 54022.850    | -0.074 | 0.15 | -0.3                   | 58.315  | 0.198  |
| 16         | 16 | 0 | 17 | 16 | 1              | 54022.850    | -0.074 | 0.15 | -0.3                   | 58.315  | 0.198  |
| 17         | 10 | 8 | 18 | 10 | 9              | 57562.420    | -0.306 | 0.10 | -1.8                   | 0.708   | -2.842 |
| 17         | 10 | 7 | 18 | 10 | 8              | 57562.420    | -0.336 | 0.10 | -2.0                   | 0.707   | -2.842 |
| 17         | 11 | 7 | 18 | 11 | 8              | 57456.020    | -0.109 | 0.10 | -0.6                   | 8.741   | -2.282 |
| 17         | 11 | 6 | 18 | 11 | 7              | 57456.020    | -0.110 | 0.10 | -0.6                   | 8.741   | -2.282 |
| 17         | 12 | 6 | 18 | 12 | 7              | 57378.620    | -0.023 | 0.10 | -0.1                   | 17.338  | -1.796 |

|    |    |    |    |    |    |           |        |      |      |         |        |
|----|----|----|----|----|----|-----------|--------|------|------|---------|--------|
| 17 | 12 | 5  | 18 | 12 | 6  | 57378.620 | -0.023 | 0.10 | -0.1 | 17.338  | -1.796 |
| 17 | 13 | 5  | 18 | 13 | 6  | 57321.410 | 0.013  | 0.15 | 0.0  | 26.546  | -1.354 |
| 17 | 13 | 4  | 18 | 13 | 5  | 57321.410 | 0.013  | 0.15 | 0.0  | 26.546  | -1.354 |
| 17 | 14 | 4  | 18 | 14 | 5  | 57278.890 | 0.092  | 0.10 | 0.5  | 36.393  | -0.938 |
| 17 | 14 | 3  | 18 | 14 | 4  | 57278.890 | 0.092  | 0.10 | 0.5  | 36.393  | -0.938 |
| 18 | 7  | 11 | 19 | 7  | 12 | 61884.160 | -0.124 | 0.20 | 9.9  | -30.728 | -8.478 |
| 18 | 8  | 11 | 19 | 8  | 12 | 61270.650 | 0.017  | 0.20 | 0.1  | -19.894 | -5.694 |
| 18 | 10 | 9  | 19 | 10 | 10 | 60835.770 | -0.016 | 0.10 | -0.1 | -3.898  | -3.739 |
| 18 | 10 | 8  | 19 | 10 | 9  | 60835.770 | -0.106 | 0.10 | -0.6 | -3.899  | -3.739 |
| 18 | 11 | 8  | 19 | 11 | 9  | 60708.650 | 0.077  | 0.10 | 0.5  | 4.738   | -3.050 |
| 18 | 11 | 7  | 19 | 11 | 8  | 60708.650 | 0.074  | 0.10 | 0.4  | 4.738   | -3.050 |
| 18 | 12 | 7  | 19 | 12 | 8  | 60616.010 | -0.005 | 0.10 | -0.0 | 13.927  | -2.465 |
| 18 | 12 | 6  | 19 | 12 | 7  | 60616.010 | -0.005 | 0.10 | -0.0 | 13.927  | -2.465 |
| 18 | 13 | 6  | 19 | 13 | 7  | 60547.670 | 0.261  | 0.10 | 1.5  | 23.733  | -1.944 |
| 18 | 13 | 5  | 19 | 13 | 6  | 60547.670 | 0.261  | 0.10 | 1.5  | 23.733  | -1.944 |
| 18 | 14 | 5  | 19 | 14 | 6  | 60496.090 | 0.039  | 0.10 | 0.2  | 34.194  | -1.462 |
| 18 | 14 | 4  | 19 | 14 | 5  | 60496.090 | 0.039  | 0.10 | 0.2  | 34.194  | -1.462 |
| 18 | 15 | 4  | 19 | 15 | 5  | 60457.830 | 0.290  | 0.10 | 1.7  | 45.338  | -1.003 |
| 18 | 15 | 3  | 19 | 15 | 4  | 60457.830 | 0.290  | 0.10 | 1.7  | 45.338  | -1.003 |
| 18 | 17 | 2  | 19 | 17 | 3  | 60408.270 | 0.352  | 0.10 | 2.1  | 69.736  | -0.115 |
| 18 | 17 | 1  | 19 | 17 | 2  | 60408.270 | 0.352  | 0.10 | 2.1  | 69.736  | -0.115 |
| 18 | 18 | 1  | 19 | 18 | 2  | 60393.350 | 0.189  | 0.15 | 0.7  | 83.012  | 0.329  |
| 18 | 18 | 0  | 19 | 18 | 1  | 60393.350 | 0.189  | 0.15 | 0.7  | 83.012  | 0.329  |
| 19 | 7  | 13 | 20 | 7  | 14 | 64928.310 | 0.152  | 0.30 | 2.3  | -33.150 | -8.206 |
| 19 | 8  | 12 | 20 | 8  | 13 | 64628.710 | -0.173 | 0.20 | -0.6 | -26.716 | -7.242 |
| 19 | 8  | 11 | 20 | 8  | 12 | 64693.370 | 0.065  | 0.20 | 0.2  | -27.808 | -7.643 |
| 19 | 9  | 11 | 20 | 9  | 12 | 64334.210 | 0.029  | 0.20 | 0.1  | -18.263 | -5.899 |
| 19 | 9  | 10 | 20 | 9  | 11 | 64339.240 | 0.251  | 0.20 | 0.7  | -18.349 | -5.925 |
| 19 | 11 | 9  | 20 | 11 | 10 | 63971.340 | 0.136  | 0.10 | 0.8  | -0.081  | -3.978 |
| 19 | 11 | 8  | 20 | 11 | 9  | 63971.340 | 0.126  | 0.10 | 0.7  | -0.082  | -3.978 |
| 19 | 12 | 8  | 20 | 12 | 9  | 63861.600 | -0.029 | 0.10 | -0.2 | 9.734   | -3.273 |
| 19 | 12 | 7  | 20 | 12 | 8  | 63861.600 | -0.030 | 0.10 | -0.2 | 9.734   | -3.273 |
| 19 | 13 | 7  | 20 | 13 | 8  | 63780.150 | -0.085 | 0.10 | -0.5 | 20.164  | -2.656 |
| 19 | 13 | 6  | 20 | 13 | 7  | 63780.150 | -0.085 | 0.10 | -0.5 | 20.164  | -2.656 |
| 19 | 14 | 6  | 20 | 14 | 7  | 63719.090 | 0.059  | 0.10 | 0.3  | 31.260  | -2.095 |
| 19 | 14 | 5  | 20 | 14 | 6  | 63719.090 | 0.059  | 0.10 | 0.3  | 31.260  | -2.095 |
| 19 | 15 | 5  | 20 | 15 | 6  | 63672.680 | -0.123 | 0.10 | -0.7 | 43.057  | -1.570 |
| 19 | 15 | 4  | 20 | 15 | 5  | 63672.680 | -0.123 | 0.10 | -0.7 | 43.057  | -1.570 |
| 19 | 18 | 2  | 20 | 18 | 3  | 63593.700 | 0.255  | 0.10 | 1.5  | 82.847  | -0.083 |
| 19 | 18 | 1  | 20 | 18 | 2  | 63593.700 | 0.255  | 0.10 | 1.5  | 82.847  | -0.083 |
| 19 | 19 | 1  | 20 | 19 | 2  | 63580.550 | -0.015 | 0.10 | -0.1 | 97.618  | 0.410  |
| 19 | 19 | 0  | 20 | 19 | 1  | 63580.550 | -0.015 | 0.10 | -0.1 | 97.618  | 0.410  |
| 20 | 8  | 13 | 21 | 8  | 14 | 68002.130 | 0.075  | 0.20 | 0.3  | -34.462 | -9.044 |
| 20 | 9  | 12 | 21 | 9  | 13 | 67671.000 | 0.294  | 0.20 | 0.9  | -25.451 | -7.470 |
| 20 | 9  | 11 | 21 | 9  | 12 | 67682.200 | 0.373  | 0.30 | 0.7  | -25.676 | -7.542 |
| 20 | 10 | 10 | 21 | 10 | 11 | 67422.160 | -0.304 | 0.10 | -1.9 | -15.802 | -6.137 |
| 20 | 12 | 9  | 21 | 12 | 10 | 67116.000 | -0.014 | 0.10 | -0.1 | 4.698   | -4.238 |
| 20 | 12 | 8  | 21 | 12 | 9  | 67116.000 | -0.015 | 0.10 | -0.1 | 4.698   | -4.238 |
| 20 | 13 | 8  | 21 | 13 | 9  | 67020.610 | 0.324  | 0.10 | 1.9  | 15.783  | -3.506 |
| 20 | 13 | 7  | 21 | 13 | 8  | 67020.610 | 0.324  | 0.10 | 1.9  | 15.783  | -3.506 |
| 20 | 14 | 7  | 21 | 14 | 8  | 66948.090 | 0.024  | 0.10 | 0.1  | 27.537  | -2.853 |
| 20 | 14 | 6  | 21 | 14 | 7  | 66948.090 | 0.024  | 0.10 | 0.1  | 27.537  | -2.853 |
| 20 | 16 | 5  | 21 | 16 | 6  | 66851.350 | -0.204 | 0.10 | -1.2 | 53.217  | -1.679 |
| 20 | 16 | 4  | 21 | 16 | 5  | 66851.350 | -0.204 | 0.10 | -1.2 | 53.217  | -1.679 |
| 20 | 17 | 4  | 21 | 17 | 5  | 66820.370 | 0.172  | 0.10 | 1.0  | 67.194  | -1.126 |
| 20 | 17 | 3  | 21 | 17 | 4  | 66820.370 | 0.172  | 0.10 | 1.0  | 67.194  | -1.126 |
| 20 | 18 | 3  | 21 | 18 | 4  | 66796.850 | -0.199 | 0.10 | -1.2 | 81.949  | -0.583 |
| 20 | 18 | 2  | 21 | 18 | 3  | 66796.850 | -0.199 | 0.10 | -1.2 | 81.949  | -0.583 |
| 21 | 9  | 13 | 22 | 9  | 14 | 71026.200 | 0.792  | 0.20 | 2.5  | -33.725 | -9.340 |
| 21 | 9  | 12 | 22 | 9  | 13 | 71049.840 | 0.052  | 0.20 | 0.2  | -34.278 | -9.531 |
| 21 | 12 | 10 | 22 | 12 | 11 | 70379.800 | 0.069  | 0.10 | 0.4  | -1.246  | -5.384 |
| 21 | 12 | 9  | 22 | 12 | 10 | 70379.800 | 0.066  | 0.10 | 0.4  | -1.246  | -5.384 |

|    |    |    |    |    |    |           |        |      |      |         |         |
|----|----|----|----|----|----|-----------|--------|------|------|---------|---------|
| 21 | 14 | 8  | 22 | 14 | 9  | 70183.580 | 0.086  | 0.10 | 0.5  | 22.971  | -3.750  |
| 21 | 14 | 7  | 22 | 14 | 8  | 70183.580 | 0.086  | 0.10 | 0.5  | 22.971  | -3.750  |
| 21 | 16 | 6  | 22 | 16 | 7  | 70069.490 | -0.253 | 0.10 | -1.5 | 50.054  | -2.406  |
| 21 | 16 | 5  | 22 | 16 | 6  | 70069.490 | -0.253 | 0.10 | -1.5 | 50.054  | -2.406  |
| 21 | 17 | 5  | 22 | 17 | 6  | 70032.220 | -0.034 | 0.15 | -0.1 | 64.761  | -1.786  |
| 21 | 17 | 4  | 22 | 17 | 5  | 70032.220 | -0.034 | 0.15 | -0.1 | 64.761  | -1.786  |
| 21 | 19 | 3  | 22 | 19 | 4  | 69983.640 | 0.019  | 0.10 | 0.1  | 96.606  | -0.587  |
| 21 | 19 | 2  | 22 | 19 | 3  | 69983.640 | 0.019  | 0.10 | 0.1  | 96.606  | -0.587  |
| 22 | 9  | 13 | 23 | 9  | 14 | 74449.220 | 0.405  | 0.30 | 0.8  | -44.409 | -11.999 |
| 22 | 10 | 13 | 23 | 10 | 14 | 74067.800 | -0.074 | 0.20 | -0.2 | -31.809 | -9.553  |
| 22 | 10 | 12 | 23 | 10 | 13 | 74071.700 | -0.143 | 0.20 | -0.4 | -31.914 | -9.585  |
| 22 | 12 | 11 | 23 | 12 | 12 | 73653.350 | -0.030 | 0.15 | -0.1 | -8.168  | -6.735  |
| 22 | 12 | 10 | 23 | 12 | 11 | 73653.350 | -0.040 | 0.15 | -0.2 | -8.168  | -6.735  |
| 22 | 13 | 10 | 23 | 13 | 11 | 73523.780 | -0.008 | 0.10 | -0.0 | 4.346   | -5.700  |
| 22 | 13 | 9  | 23 | 13 | 10 | 73523.780 | -0.008 | 0.10 | -0.0 | 4.346   | -5.700  |
| 22 | 14 | 9  | 23 | 14 | 10 | 73425.900 | 0.236  | 0.10 | 1.4  | 17.505  | -4.805  |
| 22 | 14 | 8  | 23 | 14 | 9  | 73425.900 | 0.236  | 0.10 | 1.4  | 17.505  | -4.805  |
| 22 | 16 | 7  | 23 | 16 | 8  | 73292.700 | -0.106 | 0.15 | -0.4 | 46.036  | -3.262  |
| 22 | 16 | 6  | 23 | 16 | 7  | 73292.700 | -0.106 | 0.15 | -0.4 | 46.036  | -3.262  |
| 22 | 17 | 6  | 23 | 17 | 7  | 73248.500 | -0.015 | 0.10 | -0.1 | 61.490  | -2.563  |
| 22 | 17 | 5  | 23 | 17 | 6  | 73248.500 | -0.015 | 0.10 | -0.1 | 61.490  | -2.563  |
| 22 | 19 | 4  | 23 | 19 | 5  | 73189.760 | -0.107 | 0.10 | -0.6 | 94.902  | -1.233  |
| 22 | 19 | 3  | 23 | 19 | 4  | 73189.760 | -0.107 | 0.10 | -0.6 | 94.902  | -1.233  |
| 22 | 22 | 1  | 23 | 22 | 2  | 73153.190 | 0.286  | 0.10 | 2.1  | 151.483 | 0.725   |
| 22 | 22 | 0  | 23 | 22 | 1  | 73153.190 | 0.286  | 0.10 | 2.1  | 151.483 | 0.725   |
| 23 | 10 | 13 | 24 | 10 | 14 | 77425.490 | 0.556  | 0.20 | 1.7  | -41.855 | -11.828 |
| 23 | 11 | 13 | 24 | 11 | 14 | 77139.039 | 0.145  | 0.10 | 1.0  | -28.990 | -9.823  |
| 23 | 12 | 12 | 24 | 12 | 13 | 76937.760 | 0.148  | 0.15 | 0.6  | -16.142 | -8.318  |
| 23 | 12 | 11 | 24 | 12 | 12 | 76937.760 | 0.120  | 0.15 | 0.5  | -16.143 | -8.318  |
| 23 | 13 | 11 | 24 | 13 | 12 | 76788.280 | 0.118  | 0.10 | 0.7  | -2.839  | -7.087  |
| 23 | 13 | 10 | 24 | 13 | 11 | 76788.280 | 0.117  | 0.10 | 0.7  | -2.839  | -7.087  |
| 23 | 14 | 10 | 24 | 14 | 11 | 76674.730 | -0.212 | 0.20 | -0.6 | 11.078  | -6.036  |
| 23 | 14 | 9  | 24 | 14 | 10 | 76674.730 | -0.212 | 0.20 | -0.6 | 11.078  | -6.036  |
| 23 | 15 | 9  | 24 | 15 | 10 | 76588.150 | 0.086  | 0.15 | 0.3  | 25.706  | -5.107  |
| 23 | 15 | 8  | 24 | 15 | 9  | 76588.150 | 0.086  | 0.15 | 0.3  | 25.706  | -5.107  |
| 23 | 16 | 8  | 24 | 16 | 9  | 76520.650 | -0.331 | 0.10 | -2.1 | 41.110  | -4.261  |
| 23 | 16 | 7  | 24 | 16 | 8  | 76520.650 | -0.331 | 0.10 | -2.1 | 41.110  | -4.261  |
| 23 | 18 | 6  | 24 | 18 | 7  | 76429.400 | -0.053 | 0.10 | -0.3 | 74.400  | -2.721  |
| 23 | 18 | 5  | 24 | 18 | 6  | 76429.400 | -0.053 | 0.10 | -0.3 | 74.400  | -2.721  |
| 23 | 19 | 5  | 24 | 19 | 6  | 76399.530 | 0.079  | 0.10 | 0.5  | 92.339  | -1.993  |
| 23 | 19 | 4  | 24 | 19 | 5  | 76399.530 | 0.079  | 0.10 | 0.5  | 92.339  | -1.993  |
| 23 | 20 | 4  | 24 | 20 | 5  | 76377.330 | -0.095 | 0.10 | -0.6 | 111.164 | -1.279  |
| 23 | 20 | 3  | 24 | 20 | 4  | 76377.330 | -0.095 | 0.10 | -0.6 | 111.164 | -1.279  |
| 23 | 21 | 3  | 24 | 21 | 4  | 76361.670 | -0.375 | 0.10 | -2.4 | 130.888 | -0.570  |
| 23 | 21 | 2  | 24 | 21 | 3  | 76361.670 | -0.375 | 0.10 | -2.4 | 130.888 | -0.570  |
| 23 | 22 | 2  | 24 | 22 | 3  | 76352.250 | -0.033 | 0.15 | -0.1 | 151.521 | 0.140   |
| 23 | 22 | 1  | 24 | 22 | 2  | 76352.250 | -0.033 | 0.15 | -0.1 | 151.521 | 0.140   |

rms deviation: 1.6787

Rotational constants (MHz) and kappa:

|    |         |           |           |          |
|----|---------|-----------|-----------|----------|
|    | 4176.37 | 1812.9645 | 1338.2711 | -0.66549 |
| +- | 1.9     | 0.096     | 0.099     | 0.00010  |

Inertial constants and defect (uÅ\*\*2):

|    |         |           |           |        |
|----|---------|-----------|-----------|--------|
|    | 121.009 | 278.75840 | 377.63581 | -22.13 |
| +- | 0.055   | 0.015     | 0.028     | 0.10   |

Quartic distortion constants:

|    |        |         |       |       |       |
|----|--------|---------|-------|-------|-------|
|    | 1.2605 | -9.5769 | 30.7  | 0.407 | 0.696 |
| +- | 0.0029 | 0.0087  | fixed | fixed | fixed |

Significant Digits and Correlation Matrix:

|   |       |        |        |        |
|---|-------|--------|--------|--------|
| 6 | 0.993 | -0.988 | 0.381  | -0.451 |
| 8 |       | -0.999 | 0.459  | -0.535 |
|   |       | 8      | -0.461 | 0.559  |
|   |       |        | 5      | -0.817 |
|   |       |        |        | 5      |

**Table 6S** Microwave spectrum of the first excited state of the torsion about the C-Se bond of the *synclinal* conformer of C<sub>3</sub>H<sub>5</sub><sup>80</sup>SeCN

Total number of transitions: 85

| Transition       | obs. frequency | obs.- weight |      | t    | distortion corrections |        |       |
|------------------|----------------|--------------|------|------|------------------------|--------|-------|
|                  |                | calc.        |      |      | total                  | higher | fixed |
| 11 8 4 12 8 5    | 38239.000      | 0.297        | 0.20 | 0.7  | 5.020                  | -0.530 |       |
| 11 8 3 12 8 4    | 38239.000      | 0.280        | 0.20 | 0.6  | 5.019                  | -0.530 |       |
| 11 9 3 12 9 4    | 38179.420      | -0.318       | 0.20 | -0.7 | 8.936                  | -0.337 |       |
| 11 9 2 12 9 3    | 38179.420      | -0.318       | 0.20 | -0.7 | 8.936                  | -0.337 |       |
| 11 11 1 12 11 2  | 38111.370      | -0.189       | 0.20 | -0.4 | 17.996                 | 0.014  |       |
| 11 11 0 12 11 1  | 38111.370      | -0.189       | 0.20 | -0.4 | 17.996                 | 0.014  |       |
| 12 12 1 13 12 2  | 41289.000      | 0.138        | 0.14 | 0.5  | 23.366                 | 0.034  |       |
| 12 12 0 13 12 1  | 41289.000      | 0.138        | 0.14 | 0.5  | 23.366                 | 0.034  |       |
| 13 8 6 14 8 7    | 44733.530      | 0.106        | 0.20 | 0.2  | 1.598                  | -1.252 |       |
| 13 8 5 14 8 6    | 44733.530      | -0.134       | 0.20 | -0.3 | 1.597                  | -1.252 |       |
| 13 9 5 14 9 6    | 44637.440      | 0.276        | 0.15 | 0.9  | 6.310                  | -0.935 |       |
| 13 9 4 14 9 5    | 44637.440      | 0.270        | 0.15 | 0.8  | 6.310                  | -0.935 |       |
| 13 10 4 14 10 5  | 44571.000      | -0.136       | 0.10 | -0.7 | 11.449                 | -0.663 |       |
| 13 10 3 14 10 4  | 44571.000      | -0.136       | 0.10 | -0.7 | 11.449                 | -0.663 |       |
| 13 11 3 14 11 4  | 44525.000      | 0.432        | 0.15 | 1.3  | 17.051                 | -0.414 |       |
| 13 11 2 14 11 3  | 44525.000      | 0.432        | 0.15 | 1.3  | 17.051                 | -0.414 |       |
| 13 12 2 14 12 3  | 44490.860      | -0.344       | 0.20 | -0.8 | 23.133                 | -0.175 |       |
| 13 12 2 14 12 3  | 44490.850      | -0.354       | 0.10 | -1.8 | 23.133                 | -0.175 |       |
| 13 12 1 14 12 2  | 44490.860      | -0.344       | 0.20 | -0.8 | 23.133                 | -0.175 |       |
| 13 12 1 14 12 2  | 44490.850      | -0.354       | 0.10 | -1.8 | 23.133                 | -0.175 |       |
| 13 13 1 14 13 2  | 44466.900      | -0.301       | 0.20 | -0.7 | 29.707                 | 0.061  |       |
| 13 13 0 14 13 1  | 44466.900      | -0.301       | 0.20 | -0.7 | 29.707                 | 0.061  |       |
| 14 11 4 15 11 5  | 47741.780      | 0.331        | 0.20 | 0.8  | 15.863                 | -0.732 |       |
| 14 11 3 15 11 4  | 47741.780      | 0.331        | 0.20 | 0.8  | 15.863                 | -0.732 |       |
| 15 9 7 16 9 8    | 51139.550      | 0.286        | 0.10 | 1.5  | 1.554                  | -1.933 |       |
| 15 9 6 16 9 7    | 51139.550      | 0.203        | 0.10 | 1.0  | 1.553                  | -1.933 |       |
| 15 12 4 16 12 5  | 50914.200      | 0.322        | 0.15 | 1.0  | 21.183                 | -0.802 |       |
| 15 12 3 16 12 4  | 50914.200      | 0.322        | 0.15 | 1.0  | 21.183                 | -0.802 |       |
| 15 14 2 16 14 3  | 50847.330      | -0.326       | 0.10 | -1.7 | 36.914                 | -0.174 |       |
| 15 14 1 16 14 2  | 50847.330      | -0.326       | 0.10 | -1.7 | 36.914                 | -0.174 |       |
| 16 13 4 17 13 5  | 54088.220      | 0.029        | 0.10 | 0.1  | 27.491                 | -0.871 |       |
| 16 13 3 17 13 4  | 54088.220      | 0.029        | 0.10 | 0.1  | 27.491                 | -0.871 |       |
| 17 9 9 18 9 10   | 57694.540      | 0.478        | 0.10 | 3.2  | -5.812                 | -3.499 |       |
| 17 9 8 18 9 9    | 57694.540      | -0.230       | 0.10 | -1.5 | -5.821                 | -3.501 |       |
| 17 10 8 18 10 9  | 57545.640      | 0.065        | 0.10 | 0.3  | 1.302                  | -2.823 |       |
| 17 10 7 18 10 8  | 57545.640      | 0.037        | 0.10 | 0.2  | 1.302                  | -2.823 |       |
| 17 15 3 18 15 4  | 57232.390      | -0.202       | 0.15 | -0.6 | 44.740                 | -0.543 |       |
| 17 15 2 18 15 3  | 57232.390      | -0.202       | 0.15 | -0.6 | 44.740                 | -0.543 |       |
| 18 10 9 19 10 10 | 60816.930      | 0.102        | 0.10 | 0.5  | -2.924                 | -3.713 |       |
| 18 10 8 19 10 9  | 60816.930      | 0.017        | 0.10 | 0.1  | -2.926                 | -3.713 |       |
| 18 11 8 19 11 9  | 60691.390      | 0.238        | 0.15 | 0.7  | 5.209                  | -3.031 |       |
| 18 11 7 19 11 8  | 60691.390      | 0.235        | 0.15 | 0.7  | 5.209                  | -3.031 |       |
| 18 12 7 19 12 8  | 60600.000      | 0.436        | 0.15 | 1.3  | 13.856                 | -2.452 |       |
| 18 12 6 19 12 7  | 60600.000      | 0.436        | 0.15 | 1.3  | 13.856                 | -2.452 |       |
| 18 14 5 19 14 6  | 60480.800      | 0.342        | 0.10 | 1.6  | 32.915                 | -1.460 |       |

|    |    |    |    |    |    |           |        |      |      |         |        |
|----|----|----|----|----|----|-----------|--------|------|------|---------|--------|
| 18 | 14 | 4  | 19 | 14 | 5  | 60480.800 | 0.342  | 0.10 | 1.6  | 32.915  | -1.460 |
| 18 | 15 | 4  | 19 | 15 | 5  | 60441.750 | -0.255 | 0.15 | -0.8 | 43.389  | -1.007 |
| 18 | 15 | 3  | 19 | 15 | 4  | 60441.750 | -0.255 | 0.15 | -0.8 | 43.389  | -1.007 |
| 18 | 17 | 2  | 19 | 17 | 3  | 60392.370 | 0.375  | 0.15 | 1.2  | 66.316  | -0.130 |
| 18 | 17 | 1  | 19 | 17 | 2  | 60392.370 | 0.375  | 0.15 | 1.2  | 66.316  | -0.130 |
| 19 | 9  | 11 | 20 | 9  | 12 | 64310.000 | -0.404 | 0.10 | 9.9  | -16.351 | -5.857 |
| 19 | 12 | 8  | 20 | 12 | 9  | 63843.850 | 0.054  | 0.10 | 0.3  | 10.036  | -3.253 |
| 19 | 12 | 7  | 20 | 12 | 8  | 63843.850 | 0.053  | 0.10 | 0.3  | 10.036  | -3.253 |
| 19 | 15 | 5  | 20 | 15 | 6  | 63656.020 | -0.243 | 0.15 | -0.7 | 41.374  | -1.569 |
| 19 | 15 | 4  | 20 | 15 | 5  | 63656.020 | -0.243 | 0.15 | -0.7 | 41.374  | -1.569 |
| 20 | 13 | 8  | 21 | 13 | 9  | 67002.000 | 0.079  | 0.10 | 0.4  | 15.866  | -3.487 |
| 20 | 13 | 7  | 21 | 13 | 8  | 67002.000 | 0.079  | 0.10 | 0.4  | 15.866  | -3.487 |
| 20 | 14 | 7  | 21 | 14 | 8  | 66929.970 | -0.275 | 0.10 | -1.3 | 26.923  | -2.840 |
| 20 | 14 | 6  | 21 | 14 | 7  | 66929.970 | -0.275 | 0.10 | -1.3 | 26.923  | -2.840 |
| 20 | 17 | 4  | 21 | 17 | 5  | 66802.450 | -0.011 | 0.10 | -0.1 | 64.202  | -1.134 |
| 20 | 17 | 3  | 21 | 17 | 4  | 66802.450 | -0.011 | 0.10 | -0.1 | 64.202  | -1.134 |
| 21 | 11 | 11 | 22 | 11 | 12 | 70507.040 | -0.257 | 0.10 | -1.7 | -10.573 | -6.370 |
| 21 | 11 | 10 | 22 | 11 | 11 | 70507.040 | -0.337 | 0.10 | -2.2 | -10.575 | -6.370 |
| 21 | 13 | 9  | 22 | 13 | 10 | 70248.490 | 0.208  | 0.10 | 1.1  | 11.076  | -4.487 |
| 21 | 13 | 8  | 22 | 13 | 9  | 70248.490 | 0.208  | 0.10 | 1.1  | 11.076  | -4.487 |
| 21 | 14 | 8  | 22 | 14 | 9  | 70164.020 | -0.471 | 0.10 | -2.4 | 22.781  | -3.730 |
| 21 | 14 | 7  | 22 | 14 | 8  | 70164.020 | -0.471 | 0.10 | -2.4 | 22.781  | -3.730 |
| 21 | 17 | 5  | 22 | 17 | 6  | 70013.100 | -0.494 | 0.15 | -1.5 | 62.073  | -1.788 |
| 21 | 17 | 4  | 22 | 17 | 5  | 70013.100 | -0.494 | 0.15 | -1.5 | 62.073  | -1.788 |
| 22 | 14 | 9  | 23 | 14 | 10 | 73405.790 | 0.360  | 0.10 | 2.0  | 17.805  | -4.776 |
| 22 | 14 | 8  | 23 | 14 | 9  | 73405.790 | 0.360  | 0.10 | 2.0  | 17.805  | -4.776 |
| 22 | 16 | 7  | 23 | 16 | 8  | 73273.290 | 0.030  | 0.10 | 0.2  | 44.640  | -3.250 |
| 22 | 16 | 6  | 23 | 16 | 7  | 73273.290 | 0.030  | 0.10 | 0.2  | 44.640  | -3.250 |
| 22 | 19 | 4  | 23 | 19 | 5  | 73169.650 | 0.037  | 0.15 | 0.1  | 90.573  | -1.246 |
| 22 | 19 | 3  | 23 | 19 | 4  | 73169.650 | 0.037  | 0.15 | 0.1  | 90.573  | -1.246 |
| 23 | 13 | 11 | 24 | 13 | 12 | 76765.450 | -0.103 | 0.15 | -0.4 | -1.167  | -7.039 |
| 23 | 13 | 10 | 24 | 13 | 11 | 76765.450 | -0.104 | 0.15 | -0.4 | -1.167  | -7.039 |
| 23 | 17 | 7  | 24 | 17 | 8  | 76448.600 | -0.043 | 0.10 | -0.2 | 55.445  | -3.461 |
| 23 | 17 | 6  | 24 | 17 | 7  | 76448.600 | -0.043 | 0.10 | -0.2 | 55.445  | -3.461 |
| 23 | 18 | 6  | 24 | 18 | 7  | 76408.960 | 0.234  | 0.10 | 1.3  | 71.492  | -2.719 |
| 23 | 18 | 5  | 24 | 18 | 6  | 76408.960 | 0.234  | 0.10 | 1.3  | 71.492  | -2.719 |
| 23 | 21 | 3  | 24 | 21 | 4  | 76339.440 | -0.290 | 0.15 | -1.2 | 124.578 | -0.596 |
| 23 | 21 | 2  | 24 | 21 | 3  | 76339.440 | -0.290 | 0.15 | -1.2 | 124.578 | -0.596 |
| 23 | 23 | 1  | 24 | 23 | 2  | 76323.570 | 0.266  | 0.15 | 9.9  | 164.212 | 0.812  |
| 23 | 23 | 0  | 24 | 23 | 1  | 76323.570 | 0.266  | 0.15 | 9.9  | 164.212 | 0.812  |

rms deviation: 2.2360

Rotational constants (MHz) and kappa:

|    |         |          |          |          |
|----|---------|----------|----------|----------|
|    | 4171.62 | 1810.869 | 1340.066 | -0.66746 |
| +- | fixed   | 0.031    | 0.042    | 0.00005  |

Inertial constants and defect (uÅ\*\*2):

|    |         |          |          |        |
|----|---------|----------|----------|--------|
|    | 121.147 | 279.0810 | 377.1301 | -23.10 |
| +- | fixed   | 0.0048   | 0.012    | 0.02   |



Quartic distortion constants:

|    |        |        |       |       |       |
|----|--------|--------|-------|-------|-------|
|    | 1.1490 | -8.983 | 30.7  | 0.407 | 0.696 |
| +- | 0.0060 | 0.020  | fixed | fixed | fixed |

Significant Digits and Correlation Matrix:

|   |        |        |        |
|---|--------|--------|--------|
| 7 | -0.988 | 0.778  | -0.867 |
|   | 7      | -0.696 | 0.863  |
|   |        | 5      | -0.851 |
|   |        |        | 4      |

**Table 7S** Microwave spectrum of the first excited state of the lowest bending vibration of the *synclinal* conformer of C<sub>3</sub>H<sub>5</sub><sup>80</sup>SeCN

Total number of transitions: 89

| Transition |    |   |    |    |    | obs. frequency | obs.- weight | t    | distortion corrections |        |
|------------|----|---|----|----|----|----------------|--------------|------|------------------------|--------|
|            |    |   |    |    |    |                | calc.        |      | total                  | fixed  |
| 11         | 7  | 5 | 12 | 7  | 6  | 38318.380      | 0.266 0.20   | 0.6  | 1.276                  | -0.758 |
| 11         | 7  | 4 | 12 | 7  | 5  | 38318.380      | -0.443 0.20  | -1.0 | 1.273                  | -0.758 |
| 11         | 8  | 4 | 12 | 8  | 5  | 38228.300      | 0.076 0.15   | 0.2  | 5.069                  | -0.532 |
| 11         | 8  | 3 | 12 | 8  | 4  | 38228.300      | 0.057 0.15   | 0.2  | 5.069                  | -0.532 |
| 12         | 8  | 5 | 13 | 8  | 6  | 41468.210      | 0.039 0.10   | 0.2  | 3.421                  | -0.845 |
| 12         | 8  | 4 | 13 | 8  | 5  | 41468.210      | -0.033 0.10  | -0.2 | 3.421                  | -0.845 |
| 12         | 9  | 4 | 13 | 9  | 5  | 41391.580      | -0.366 0.10  | -1.9 | 8.032                  | -0.597 |
| 12         | 9  | 3 | 13 | 9  | 4  | 41391.580      | -0.368 0.10  | -1.9 | 8.032                  | -0.597 |
| 13         | 9  | 5 | 14 | 9  | 6  | 44624.800      | -0.193 0.10  | -1.0 | 6.269                  | -0.939 |
| 13         | 9  | 4 | 14 | 9  | 5  | 44624.800      | -0.200 0.10  | -1.0 | 6.269                  | -0.939 |
| 13         | 11 | 3 | 14 | 11 | 4  | 44512.790      | 0.365 0.15   | 1.2  | 17.790                 | -0.413 |
| 13         | 11 | 2 | 14 | 11 | 3  | 44512.790      | 0.365 0.15   | 1.2  | 17.790                 | -0.413 |
| 14         | 9  | 6 | 15 | 9  | 7  | 47869.290      | 0.072 0.15   | 0.2  | 3.922                  | -1.381 |
| 14         | 9  | 5 | 15 | 9  | 6  | 47869.290      | 0.047 0.15   | 0.1  | 3.922                  | -1.381 |
| 14         | 10 | 5 | 15 | 10 | 6  | 47786.830      | 0.149 0.15   | 0.5  | 9.905                  | -1.038 |
| 14         | 10 | 4 | 15 | 10 | 5  | 47786.830      | 0.149 0.15   | 0.5  | 9.905                  | -1.038 |
| 14         | 14 | 1 | 15 | 14 | 2  | 47634.340      | -0.127 0.15  | -0.4 | 39.194                 | 0.101  |
| 14         | 14 | 0 | 15 | 14 | 1  | 47634.340      | -0.127 0.15  | -0.4 | 39.194                 | 0.101  |
| 15         | 9  | 7 | 16 | 9  | 8  | 51125.480      | -0.114 0.15  | -0.4 | 0.931                  | -1.942 |
| 15         | 9  | 6 | 16 | 9  | 7  | 51125.480      | -0.199 0.15  | -0.6 | 0.931                  | -1.942 |
| 15         | 10 | 6 | 16 | 10 | 7  | 51023.880      | -0.075 0.15  | -0.2 | 7.415                  | -1.512 |
| 15         | 10 | 5 | 16 | 10 | 6  | 51023.880      | -0.077 0.15  | -0.2 | 7.415                  | -1.512 |
| 15         | 11 | 5 | 16 | 11 | 6  | 50951.930      | -0.121 0.15  | -0.4 | 14.416                 | -1.140 |
| 15         | 11 | 4 | 16 | 11 | 5  | 50951.930      | -0.121 0.15  | -0.4 | 14.416                 | -1.140 |
| 15         | 12 | 4 | 16 | 12 | 5  | 50899.750      | -0.361 0.15  | -1.1 | 21.976                 | -0.802 |
| 15         | 12 | 3 | 16 | 12 | 4  | 50899.750      | -0.361 0.15  | -1.1 | 21.976                 | -0.802 |
| 15         | 15 | 1 | 16 | 15 | 2  | 50814.900      | 0.293 0.20   | 0.7  | 48.209                 | 0.144  |
| 15         | 15 | 0 | 16 | 15 | 1  | 50814.900      | 0.293 0.20   | 0.7  | 48.209                 | 0.144  |
| 16         | 9  | 8 | 17 | 9  | 9  | 54395.110      | -0.051 0.10  | -0.3 | -2.771                 | -2.646 |
| 16         | 9  | 7 | 17 | 9  | 8  | 54395.110      | -0.312 0.10  | -1.7 | -2.774                 | -2.646 |
| 16         | 10 | 7 | 17 | 10 | 8  | 54271.800      | 0.326 0.10   | 1.6  | 4.252                  | -2.105 |
| 16         | 10 | 6 | 17 | 10 | 7  | 54271.800      | 0.317 0.10   | 1.5  | 4.252                  | -2.105 |
| 16         | 11 | 6 | 17 | 11 | 7  | 54183.720      | -0.164 0.15  | -0.5 | 11.786                 | -1.650 |
| 16         | 11 | 5 | 17 | 11 | 6  | 54183.720      | -0.164 0.15  | -0.5 | 11.786                 | -1.650 |
| 16         | 14 | 3 | 17 | 14 | 4  | 54039.260      | -0.096 0.10  | -0.5 | 37.923                 | -0.511 |
| 16         | 14 | 2 | 17 | 14 | 3  | 54039.260      | -0.096 0.10  | -0.5 | 37.923                 | -0.511 |
| 17         | 9  | 9 | 18 | 9  | 10 | 57679.180      | 0.160 0.10   | 1.0  | -7.259                 | -3.518 |
| 17         | 10 | 8 | 18 | 10 | 9  | 57530.390      | 0.354 0.10   | 1.7  | 0.351                  | -2.837 |
| 17         | 10 | 7 | 18 | 10 | 8  | 57530.390      | 0.325 0.10   | 1.6  | 0.351                  | -2.837 |
| 17         | 11 | 7 | 18 | 11 | 8  | 57424.720      | 0.211 0.10   | 1.0  | 8.451                  | -2.279 |
| 17         | 11 | 6 | 18 | 11 | 7  | 57424.730      | 0.221 0.10   | 1.1  | 8.451                  | -2.279 |
| 17         | 12 | 6 | 18 | 12 | 7  | 57348.000      | 0.154 0.10   | 0.7  | 17.120                 | -1.794 |
| 17         | 12 | 5 | 18 | 12 | 6  | 57348.000      | 0.154 0.10   | 0.7  | 17.120                 | -1.794 |
| 17         | 13 | 5 | 18 | 13 | 6  | 57291.500      | 0.243 0.10   | 1.2  | 26.406                 | -1.353 |
| 17         | 13 | 4 | 18 | 13 | 5  | 57291.500      | 0.243 0.10   | 1.2  | 26.406                 | -1.353 |
| 17         | 14 | 4 | 18 | 14 | 5  | 57249.000      | -0.199 0.10  | -1.0 | 36.338                 | -0.938 |
| 17         | 14 | 3 | 18 | 14 | 4  | 57249.000      | -0.199 0.10  | -1.0 | 36.338                 | -0.938 |
| 18         | 10 | 9 | 19 | 10 | 10 | 60800.790      | 0.292 0.10   | 1.5  | -4.355                 | -3.733 |
| 18         | 10 | 8 | 19 | 10 | 9  | 60800.790      | 0.203 0.10   | 1.0  | -4.357                 | -3.733 |
| 18         | 11 | 8 | 19 | 11 | 9  | 60674.500      | -0.048 0.10  | -0.2 | 4.351                  | -3.046 |
| 18         | 11 | 7 | 19 | 11 | 8  | 60674.500      | -0.051 0.10  | -0.2 | 4.351                  | -3.046 |
| 18         | 12 | 7 | 19 | 12 | 8  | 60582.970      | 0.015 0.10   | 0.1  | 13.616                 | -2.462 |

|    |    |    |    |    |    |           |        |      |      |         |        |
|----|----|----|----|----|----|-----------|--------|------|------|---------|--------|
| 18 | 12 | 6  | 19 | 12 | 7  | 60582.970 | 0.015  | 0.10 | 0.1  | 13.616  | -2.462 |
| 18 | 13 | 6  | 19 | 13 | 7  | 60515.000 | -0.115 | 0.10 | -0.6 | 23.505  | -1.942 |
| 18 | 13 | 5  | 19 | 13 | 6  | 60515.000 | -0.115 | 0.10 | -0.6 | 23.505  | -1.942 |
| 19 | 10 | 10 | 20 | 10 | 11 | 64084.220 | 0.436  | 0.10 | 2.5  | -9.942  | -4.818 |
| 19 | 10 | 9  | 20 | 10 | 10 | 64084.220 | 0.187  | 0.10 | 1.1  | -9.946  | -4.819 |
| 19 | 11 | 9  | 20 | 11 | 10 | 63934.340 | -0.323 | 0.10 | -1.6 | -0.579  | -3.972 |
| 19 | 11 | 8  | 20 | 11 | 9  | 63934.340 | -0.332 | 0.10 | -1.6 | -0.579  | -3.972 |
| 19 | 12 | 8  | 20 | 12 | 9  | 63825.860 | -0.354 | 0.10 | -1.7 | 9.317   | -3.268 |
| 19 | 12 | 7  | 20 | 12 | 8  | 63825.860 | -0.354 | 0.10 | -1.7 | 9.317   | -3.268 |
| 19 | 13 | 7  | 20 | 13 | 8  | 63745.860 | 0.151  | 0.10 | 0.7  | 19.834  | -2.653 |
| 19 | 13 | 6  | 20 | 13 | 7  | 63745.860 | 0.151  | 0.10 | 0.7  | 19.834  | -2.653 |
| 20 | 12 | 9  | 21 | 12 | 10 | 67077.760 | -0.384 | 0.10 | -1.9 | 4.162   | -4.232 |
| 20 | 12 | 8  | 21 | 12 | 9  | 67077.760 | -0.385 | 0.10 | -1.9 | 4.162   | -4.232 |
| 20 | 14 | 7  | 21 | 14 | 8  | 66912.500 | 0.447  | 0.10 | 2.2  | 27.191  | -2.850 |
| 20 | 14 | 6  | 21 | 14 | 7  | 66912.500 | 0.447  | 0.10 | 2.2  | 27.191  | -2.850 |
| 21 | 11 | 11 | 22 | 11 | 12 | 70487.850 | -0.170 | 0.10 | -1.0 | -13.213 | -6.404 |
| 21 | 11 | 10 | 22 | 11 | 11 | 70487.850 | -0.254 | 0.10 | -1.5 | -13.215 | -6.404 |
| 21 | 12 | 10 | 22 | 12 | 11 | 70339.320 | 0.020  | 0.10 | 0.1  | -1.917  | -5.376 |
| 21 | 12 | 9  | 22 | 12 | 10 | 70339.320 | 0.016  | 0.10 | 0.1  | -1.917  | -5.376 |
| 21 | 13 | 9  | 22 | 13 | 10 | 70229.150 | 0.414  | 0.10 | 2.2  | 9.956   | -4.508 |
| 21 | 13 | 8  | 22 | 13 | 9  | 70229.150 | 0.414  | 0.10 | 2.2  | 9.956   | -4.508 |
| 21 | 14 | 8  | 22 | 14 | 9  | 70145.150 | -0.043 | 0.10 | -0.2 | 22.500  | -3.745 |
| 21 | 14 | 7  | 22 | 14 | 8  | 70145.150 | -0.043 | 0.10 | -0.2 | 22.500  | -3.745 |
| 21 | 15 | 7  | 22 | 15 | 8  | 70081.210 | -0.306 | 0.10 | -1.6 | 35.772  | -3.052 |
| 21 | 15 | 6  | 22 | 15 | 7  | 70081.210 | -0.306 | 0.10 | -1.6 | 35.772  | -3.052 |
| 22 | 11 | 12 | 23 | 11 | 13 | 73782.790 | -0.075 | 0.10 | -0.6 | -21.072 | -7.967 |
| 22 | 11 | 11 | 23 | 11 | 12 | 73782.790 | -0.298 | 0.10 | -2.4 | -21.078 | -7.968 |
| 22 | 14 | 9  | 23 | 14 | 10 | 73385.020 | 0.028  | 0.10 | 0.2  | 16.893  | -4.798 |
| 22 | 14 | 8  | 23 | 14 | 9  | 73385.020 | 0.028  | 0.10 | 0.2  | 16.893  | -4.798 |
| 22 | 18 | 5  | 23 | 18 | 6  | 73177.420 | 0.334  | 0.20 | 0.8  | 77.674  | -1.892 |
| 22 | 18 | 4  | 23 | 18 | 5  | 73177.420 | 0.334  | 0.20 | 0.8  | 77.674  | -1.892 |
| 22 | 20 | 3  | 23 | 20 | 4  | 73135.170 | 0.057  | 0.20 | 0.2  | 113.095 | -0.588 |
| 22 | 20 | 2  | 23 | 20 | 3  | 73135.170 | 0.057  | 0.20 | 0.2  | 113.095 | -0.588 |
| 23 | 14 | 10 | 24 | 14 | 11 | 76631.890 | 0.078  | 0.15 | 0.3  | 10.310  | -6.027 |
| 23 | 14 | 9  | 24 | 14 | 10 | 76631.890 | 0.078  | 0.15 | 0.3  | 10.310  | -6.027 |
| 23 | 21 | 3  | 24 | 21 | 4  | 76323.570 | -0.137 | 0.15 | 9.9  | 131.143 | -0.576 |
| 23 | 21 | 2  | 24 | 21 | 3  | 76323.570 | -0.137 | 0.15 | 9.9  | 131.143 | -0.576 |

rms deviation: 2.1992

Rotational constants (MHz) and kappa:

|    |        |           |          |          |
|----|--------|-----------|----------|----------|
|    | 4160.7 | 1810.5563 | 1339.289 | -0.66593 |
| +- | fixed  | 0.038     | 0.051    | 0.00006  |

Inertial constants and defect ( $\text{u}\text{\AA}^2$ ):

|    |        |           |          |        |
|----|--------|-----------|----------|--------|
|    | 121.46 | 279.12918 | 377.3488 | -23.25 |
| +- | fixed  | 0.0059    | 0.014    | 0.02   |

Quartic distortion constants:

|    |        |        |       |       |       |
|----|--------|--------|-------|-------|-------|
|    | 1.2890 | -9.664 | 30.7  | 0.407 | 0.696 |
| +- | 0.0073 | 0.028  | fixed | fixed | fixed |

Significant Digits and Correlation Matrix:

|   |        |        |        |
|---|--------|--------|--------|
| 8 | -0.992 | 0.870  | -0.898 |
|   | 7      | -0.819 | 0.902  |
|   |        | 5      | -0.885 |
|   |        |        | 4      |

**Table 8S** Microwave spectrum of the third excited state of the *synclinal* conformer of  $C_3H_5^{80}SeCN$

Total number of transitions: 32

| Transition        | obs. frequency | obs.- calc. | weight | t    | distortion | total  | corrections fixed |
|-------------------|----------------|-------------|--------|------|------------|--------|-------------------|
| 14 11 4 15 11 5   | 47843.400      | -0.271      | 0.20   | -0.5 | 19.471     | -0.737 |                   |
| 14 11 3 15 11 4   | 47843.400      | -0.271      | 0.20   | -0.5 | 19.471     | -0.737 |                   |
| 15 11 5 16 11 6   | 51078.280      | 0.621       | 0.20   | 1.2  | 18.033     | -1.156 |                   |
| 15 11 4 16 11 5   | 51078.280      | 0.621       | 0.20   | 1.2  | 18.033     | -1.156 |                   |
| 16 13 4 17 13 5   | 54203.870      | -0.101      | 0.10   | 9.9  | 33.159     | -0.868 |                   |
| 16 13 3 17 13 4   | 54203.870      | -0.101      | 0.10   | 9.9  | 33.159     | -0.868 |                   |
| 17 12 6 18 12 7   | 57490.940      | -0.576      | 0.10   | -4.3 | 22.200     | -1.823 |                   |
| 17 12 5 18 12 6   | 57490.940      | -0.576      | 0.10   | -4.3 | 22.200     | -1.823 |                   |
| 17 14 4 18 14 5   | 57387.620      | 0.496       | 0.10   | 6.2  | 41.805     | -0.931 |                   |
| 17 14 3 18 14 4   | 57387.620      | 0.496       | 0.10   | 6.2  | 41.805     | -0.931 |                   |
| 17 15 3 18 15 4   | 57354.320      | 0.342       | 0.12   | 2.2  | 52.614     | -0.511 |                   |
| 17 15 2 18 15 3   | 57354.320      | 0.342       | 0.12   | 2.2  | 52.614     | -0.511 |                   |
| 18 14 5 19 14 6   | 60612.800      | 0.319       | 0.10   | 1.9  | 40.311     | -1.469 |                   |
| 18 14 4 19 14 5   | 60612.800      | 0.319       | 0.10   | 1.9  | 40.311     | -1.469 |                   |
| 19 9 11 20 9 12   | 64487.480      | 0.652       | 0.15   | 9.9  | -12.841    | -6.042 |                   |
| 19 9 10 20 9 11   | 64492.140      | -0.459      | 0.15   | 9.9  | -12.944    | -6.070 |                   |
| 19 13 7 20 13 8   | 63907.560      | -0.341      | 0.10   | 9.9  | 26.727     | -2.701 |                   |
| 19 13 6 20 13 7   | 63907.560      | -0.341      | 0.10   | 9.9  | 26.727     | -2.701 |                   |
| 19 16 4 20 16 5   | 63758.400      | -0.676      | 0.15   | -1.7 | 63.163     | -1.048 |                   |
| 19 16 3 20 16 4   | 63758.400      | -0.676      | 0.15   | -1.7 | 63.163     | -1.048 |                   |
| 20 13 8 21 13 9   | 67157.260      | 0.001       | 0.15   | 0.0  | 23.161     | -3.574 |                   |
| 20 13 7 21 13 8   | 67157.260      | 0.001       | 0.15   | 0.0  | 23.161     | -3.574 |                   |
| 22 12 11 23 12 12 | 73816.750      | 0.510       | 0.20   | 9.9  | 0.672      | -6.891 |                   |
| 22 12 10 23 12 11 | 73816.750      | 0.497       | 0.20   | 9.9  | 0.672      | -6.891 |                   |
| 22 17 6 23 17 7   | 73392.800      | 0.030       | 0.15   | 9.9  | 72.365     | -2.575 |                   |
| 22 17 5 23 17 6   | 73392.800      | 0.030       | 0.15   | 9.9  | 72.365     | -2.575 |                   |
| 22 20 3 23 20 4   | 73312.180      | -0.019      | 0.15   | 9.9  | 125.244    | -0.507 |                   |
| 22 20 2 23 20 3   | 73312.180      | -0.019      | 0.15   | 9.9  | 125.244    | -0.507 |                   |
| 23 20 4 24 20 5   | 76526.030      | 0.272       | 0.15   | 9.9  | 124.709    | -1.222 |                   |
| 23 20 3 24 20 4   | 76526.030      | 0.272       | 0.15   | 9.9  | 124.709    | -1.222 |                   |
| 23 22 2 24 22 3   | 76498.740      | -0.244      | 0.15   | 9.9  | 166.225    | 0.263  |                   |
| 23 22 1 24 22 2   | 76498.740      | -0.244      | 0.15   | 9.9  | 166.225    | 0.263  |                   |

rms deviation: 3.2402

Rotational constants (MHz) and kappa:

|    |        |          |          |          |
|----|--------|----------|----------|----------|
|    | 4176.4 | 1820.090 | 1335.633 | -0.65893 |
| +- | fixed  | 0.084    | 0.10     | 0.00012  |

Inertial constants and defect ( $u\text{\AA}^2$ ):

|    |        |          |          |        |
|----|--------|----------|----------|--------|
|    | 121.01 | 277.6671 | 378.3816 | -20.29 |
| +- | fixed  | 0.013    | 0.029    | 0.04   |

Quartic distortion constants:

|    |       |        |       |       |       |
|----|-------|--------|-------|-------|-------|
|    | 1.106 | -9.842 | 30.7  | 0.407 | 0.696 |
| +- | 0.023 | 0.054  | fixed | fixed | fixed |

Significant Digits and Correlation Matrix:

|   |        |        |        |
|---|--------|--------|--------|
| 7 | -0.984 | 0.825  | -0.885 |
|   | 7      | -0.728 | 0.855  |
|   |        | 4      | -0.911 |
|   |        |        | 4      |

**Table 9S** Microwave spectrum of the ground vibrational state of the *synclinal* conformer of C<sub>3</sub>H<sub>5</sub>Se<sup>78</sup>CN

Total number of transitions: 99

| Transition |    |    |    |    | obs. frequency | obs.- weight<br>calc. |        | t    | distortion | corrections |        |
|------------|----|----|----|----|----------------|-----------------------|--------|------|------------|-------------|--------|
|            |    |    |    |    |                |                       |        |      | total      | fixed       |        |
| 11         | 7  | 4  | 12 | 7  | 5              | 38392.140             | -0.081 | 0.10 | -0.4       | 1.527       | -0.745 |
| 11         | 8  | 4  | 12 | 8  | 5              | 38303.290             | 0.146  | 0.15 | 0.5        | 5.335       | -0.525 |
| 11         | 8  | 3  | 12 | 8  | 4              | 38303.290             | 0.129  | 0.15 | 0.4        | 5.335       | -0.525 |
| 11         | 10 | 2  | 12 | 10 | 3              | 38205.520             | -0.091 | 0.10 | -0.5       | 14.208      | -0.163 |
| 11         | 10 | 1  | 12 | 10 | 2              | 38205.520             | -0.091 | 0.10 | -0.5       | 14.208      | -0.163 |
| 12         | 8  | 5  | 13 | 8  | 6              | 41548.810             | 0.308  | 0.20 | 0.7        | 3.748       | -0.832 |
| 12         | 8  | 4  | 13 | 8  | 5              | 41548.810             | 0.244  | 0.20 | 0.6        | 3.748       | -0.832 |
| 12         | 9  | 4  | 13 | 9  | 5              | 41473.750             | 0.208  | 0.15 | 0.7        | 8.375       | -0.591 |
| 12         | 9  | 3  | 13 | 9  | 4              | 41473.750             | 0.207  | 0.15 | 0.6        | 8.375       | -0.591 |
| 12         | 11 | 2  | 13 | 11 | 3              | 41386.940             | 0.278  | 0.10 | 1.4        | 19.026      | -0.175 |
| 12         | 11 | 1  | 13 | 11 | 2              | 41386.940             | 0.278  | 0.10 | 1.4        | 19.026      | -0.175 |
| 12         | 12 | 1  | 13 | 12 | 2              | 41361.370             | -0.099 | 0.10 | -0.5       | 25.084      | 0.022  |
| 12         | 12 | 0  | 13 | 12 | 1              | 41361.370             | -0.099 | 0.10 | -0.5       | 25.084      | 0.022  |
| 13         | 9  | 5  | 14 | 9  | 6              | 44712.120             | 0.001  | 0.10 | 0.0        | 6.684       | -0.925 |
| 13         | 9  | 4  | 14 | 9  | 5              | 44712.120             | -0.005 | 0.10 | -0.0       | 6.684       | -0.925 |
| 13         | 11 | 3  | 14 | 11 | 4              | 44601.140             | -0.352 | 0.10 | -1.8       | 18.250      | -0.416 |
| 13         | 11 | 2  | 14 | 11 | 3              | 44601.140             | -0.352 | 0.10 | -1.8       | 18.250      | -0.416 |
| 13         | 12 | 2  | 14 | 12 | 3              | 44569.150             | 0.189  | 0.15 | 0.6        | 24.805      | -0.184 |
| 13         | 12 | 1  | 14 | 12 | 2              | 44569.150             | 0.189  | 0.15 | 0.6        | 24.805      | -0.184 |
| 14         | 8  | 7  | 15 | 8  | 8              | 48080.000             | -0.064 | 0.20 | -0.1       | -1.113      | -1.759 |
| 14         | 8  | 6  | 15 | 8  | 7              | 48080.000             | -0.741 | 0.20 | -1.7       | -1.118      | -1.760 |
| 14         | 10 | 5  | 15 | 10 | 6              | 47880.110             | -0.442 | 0.15 | -1.4       | 10.424      | -1.025 |
| 14         | 10 | 4  | 15 | 10 | 5              | 47880.110             | -0.442 | 0.15 | -1.4       | 10.424      | -1.025 |
| 15         | 10 | 6  | 16 | 10 | 7              | 51123.310             | 0.010  | 0.20 | 0.0        | 8.029       | -1.488 |
| 15         | 10 | 5  | 16 | 10 | 6              | 51123.310             | 0.008  | 0.20 | 0.0        | 8.029       | -1.488 |
| 15         | 12 | 4  | 16 | 12 | 5              | 51001.310             | -0.323 | 0.20 | -0.7       | 22.643      | -0.800 |
| 15         | 12 | 3  | 16 | 12 | 4              | 51001.310             | -0.323 | 0.20 | -0.7       | 22.643      | -0.800 |
| 16         | 10 | 7  | 17 | 10 | 8              | 54376.470             | 0.345  | 0.10 | 1.7        | 4.974       | -2.068 |
| 16         | 10 | 6  | 17 | 10 | 7              | 54376.470             | 0.338  | 0.10 | 1.7        | 4.974       | -2.068 |
| 16         | 15 | 2  | 17 | 15 | 3              | 54123.280             | -0.314 | 0.15 | -1.0       | 48.781      | -0.186 |
| 16         | 15 | 1  | 17 | 15 | 2              | 54123.280             | -0.314 | 0.15 | -1.0       | 48.781      | -0.186 |
| 17         | 14 | 4  | 18 | 14 | 5              | 57363.730             | -0.281 | 0.10 | -1.4       | 37.309      | -0.943 |
| 17         | 14 | 3  | 18 | 14 | 4              | 57363.730             | -0.281 | 0.10 | -1.4       | 37.309      | -0.943 |
| 18         | 8  | 11 | 19 | 8  | 12             | 61339.130             | -0.117 | 0.20 | -0.4       | -19.507     | -5.572 |
| 18         | 8  | 10 | 19 | 8  | 11             | 61365.110             | -0.701 | 0.20 | -2.5       | -19.912     | -5.715 |
| 18         | 10 | 9  | 19 | 10 | 10             | 60915.200             | 0.022  | 0.10 | 0.1        | -3.372      | -3.661 |
| 18         | 10 | 8  | 19 | 10 | 9              | 60915.200             | -0.053 | 0.10 | -0.3       | -3.373      | -3.661 |
| 18         | 11 | 8  | 19 | 11 | 9              | 60791.750             | 0.335  | 0.10 | 1.6        | 5.355       | -2.991 |
| 18         | 11 | 7  | 19 | 11 | 8              | 60791.750             | 0.333  | 0.10 | 1.6        | 5.355       | -2.991 |
| 18         | 12 | 7  | 19 | 12 | 8              | 60701.700             | 0.269  | 0.10 | 1.3        | 14.648      | -2.424 |
| 18         | 12 | 6  | 19 | 12 | 7              | 60701.700             | 0.269  | 0.10 | 1.3        | 14.648      | -2.424 |
| 18         | 13 | 6  | 19 | 13 | 7              | 60634.570             | -0.253 | 0.10 | -1.2       | 24.571      | -1.920 |
| 18         | 13 | 5  | 19 | 13 | 6              | 60634.570             | -0.253 | 0.10 | -1.2       | 24.571      | -1.920 |
| 18         | 15 | 4  | 19 | 15 | 5              | 60547.670             | -0.203 | 0.15 | -0.6       | 46.447      | -1.013 |
| 18         | 15 | 3  | 19 | 15 | 4              | 60547.670             | -0.203 | 0.15 | -0.6       | 46.447      | -1.013 |
| 18         | 16 | 3  | 19 | 16 | 4              | 60520.280             | -0.031 | 0.10 | -0.2       | 58.443      | -0.584 |
| 18         | 16 | 2  | 19 | 16 | 3              | 60520.280             | -0.031 | 0.10 | -0.2       | 58.443      | -0.584 |
| 19         | 8  | 12 | 20 | 8  | 13             | 64697.550             | -0.882 | 0.20 | 9.9        | -26.299     | -7.092 |
| 19         | 9  | 11 | 20 | 9  | 12             | 64409.460             | -0.411 | 0.20 | -1.0       | -17.765     | -5.770 |
| 19         | 10 | 10 | 20 | 10 | 11             | 64203.080             | -0.060 | 0.15 | -0.2       | -8.801      | -4.723 |
| 19         | 10 | 9  | 20 | 10 | 10             | 64203.080             | -0.273 | 0.15 | -0.9       | -8.805      | -4.724 |
| 19         | 11 | 9  | 20 | 11 | 10             | 64056.390             | -0.243 | 0.15 | -0.8       | 0.578       | -3.898 |

|       |             |           |        |      |      |         |         |
|-------|-------------|-----------|--------|------|------|---------|---------|
| 19 11 | 8 20 11 9   | 64056.390 | -0.252 | 0.15 | -0.8 | 0.577   | -3.898  |
| 19 12 | 8 20 12 9   | 63950.070 | -0.021 | 0.15 | -0.1 | 10.500  | -3.212  |
| 19 12 | 7 20 12 8   | 63950.070 | -0.021 | 0.15 | -0.1 | 10.500  | -3.212  |
| 19 14 | 6 20 14 7   | 63812.020 | 0.325  | 0.10 | 1.6  | 32.282  | -2.073  |
| 19 14 | 5 20 14 6   | 63812.020 | 0.325  | 0.10 | 1.6  | 32.282  | -2.073  |
| 19 15 | 5 20 15 6   | 63766.730 | -0.264 | 0.10 | -1.3 | 44.226  | -1.567  |
| 19 15 | 4 20 15 5   | 63766.730 | -0.264 | 0.10 | -1.3 | 44.226  | -1.567  |
| 19 18 | 2 20 18 3   | 63691.270 | 0.307  | 0.10 | 1.7  | 84.528  | -0.138  |
| 19 18 | 1 20 18 2   | 63691.270 | 0.307  | 0.10 | 1.7  | 84.528  | -0.138  |
| 20 9  | 12 21 9 13  | 67746.900 | -0.157 | 0.20 | -0.4 | -24.905 | -7.306  |
| 20 9  | 11 21 9 12  | 67756.750 | 0.149  | 0.20 | 0.4  | -25.101 | -7.371  |
| 20 11 | 10 21 11 11 | 67332.510 | 0.063  | 0.10 | 0.3  | -5.081  | -4.984  |
| 20 11 | 9 21 11 10  | 67332.510 | 0.038  | 0.10 | 0.2  | -5.082  | -4.984  |
| 20 14 | 7 21 14 8   | 67044.050 | -0.163 | 0.15 | -0.5 | 28.615  | -2.812  |
| 20 14 | 6 21 14 7   | 67044.050 | -0.163 | 0.15 | -0.5 | 28.615  | -2.812  |
| 20 15 | 6 21 15 7   | 66991.260 | 0.146  | 0.10 | 0.7  | 41.236  | -2.230  |
| 20 15 | 5 21 15 6   | 66991.260 | 0.146  | 0.10 | 0.7  | 41.236  | -2.230  |
| 21 9  | 13 22 9 14  | 71102.190 | 0.100  | 0.25 | 0.2  | -33.128 | -9.137  |
| 21 12 | 10 22 12 11 | 70473.840 | 0.306  | 0.10 | 1.6  | -0.380  | -5.274  |
| 21 12 | 9 22 12 10  | 70473.840 | 0.303  | 0.10 | 1.6  | -0.381  | -5.274  |
| 21 16 | 6 22 16 7   | 70173.080 | 0.188  | 0.10 | 0.9  | 51.519  | -2.389  |
| 21 16 | 5 22 16 6   | 70173.080 | 0.188  | 0.10 | 0.9  | 51.519  | -2.389  |
| 21 19 | 3 22 19 4   | 70090.500 | -0.004 | 0.10 | -0.0 | 98.666  | -0.640  |
| 21 19 | 2 22 19 3   | 70090.500 | -0.004 | 0.10 | -0.0 | 98.666  | -0.640  |
| 22 11 | 12 23 11 13 | 73919.020 | 0.113  | 0.10 | 0.7  | -19.342 | -7.807  |
| 22 11 | 11 23 11 12 | 73919.020 | -0.074 | 0.10 | -0.5 | -19.347 | -7.808  |
| 22 12 | 11 23 12 12 | 73749.520 | 0.085  | 0.15 | 0.3  | -7.246  | -6.593  |
| 22 12 | 10 23 12 11 | 73749.520 | 0.077  | 0.15 | 0.3  | -7.247  | -6.593  |
| 22 13 | 10 23 13 11 | 73623.280 | -0.218 | 0.20 | -0.5 | 5.395   | -5.587  |
| 22 13 | 9 23 13 10  | 73623.280 | -0.218 | 0.20 | -0.5 | 5.395   | -5.587  |
| 22 14 | 9 23 14 10  | 73528.550 | 0.316  | 0.10 | 1.8  | 18.700  | -4.718  |
| 22 14 | 8 23 14 9   | 73528.550 | 0.316  | 0.10 | 1.8  | 18.700  | -4.718  |
| 22 15 | 8 23 15 9   | 73455.090 | -0.338 | 0.10 | -1.9 | 32.743  | -3.940  |
| 22 15 | 7 23 15 8   | 73455.090 | -0.338 | 0.10 | -1.9 | 32.743  | -3.940  |
| 22 19 | 4 23 19 5   | 73300.810 | -0.061 | 0.15 | -0.2 | 97.056  | -1.272  |
| 22 19 | 3 23 19 4   | 73300.810 | -0.061 | 0.15 | -0.2 | 97.056  | -1.272  |
| 22 20 | 3 23 20 4   | 73284.290 | 0.276  | 0.10 | 2.0  | 115.277 | -0.648  |
| 22 20 | 2 23 20 3   | 73284.290 | 0.276  | 0.10 | 2.0  | 115.277 | -0.648  |
| 22 21 | 2 23 21 3   | 73273.290 | 0.323  | 0.15 | 1.3  | 134.380 | -0.024  |
| 22 21 | 1 23 21 2   | 73273.290 | 0.323  | 0.15 | 1.3  | 134.380 | -0.024  |
| 23 9  | 14 24 9 15  | 77951.700 | 0.203  | 0.25 | 9.9  | -55.431 | -14.709 |
| 23 17 | 7 24 17 8   | 76580.970 | -0.310 | 0.10 | -1.8 | 59.139  | -3.438  |
| 23 17 | 6 24 17 7   | 76580.970 | -0.310 | 0.10 | -1.8 | 59.139  | -3.438  |
| 23 18 | 6 24 18 7   | 76543.300 | 0.185  | 0.20 | 0.4  | 76.421  | -2.714  |
| 23 18 | 5 24 18 6   | 76543.300 | 0.185  | 0.20 | 0.4  | 76.421  | -2.714  |
| 23 19 | 5 24 19 6   | 76514.020 | -0.456 | 0.10 | -2.7 | 94.588  | -2.014  |
| 23 19 | 4 24 19 5   | 76514.020 | -0.456 | 0.10 | -2.7 | 94.588  | -2.014  |

rms deviation: 2.2214

Rotational constants (MHz) and kappa:

|    |         |           |          |         |
|----|---------|-----------|----------|---------|
|    | 4219.67 | 1814.6722 | 1341.927 | -0.6714 |
| +- | 6.9     | 0.33      | 0.34     | 0.0004  |

Inertial constants and defect ( $\text{u}\text{\AA}^2$ ):

|    |         |           |          |       |
|----|---------|-----------|----------|-------|
|    | 119.767 | 278.49607 | 376.6071 | -21.7 |
| +- | 0.19    | 0.051     | 0.095    | 0.3   |

Quartic distortion constants:

|     |        |        |       |       |       |
|-----|--------|--------|-------|-------|-------|
|     | 1.2662 | -9.723 | 30.7  | 0.407 | 0.696 |
| + - | 0.0063 | 0.021  | fixed | fixed | fixed |

Significant Digits and Correlation Matrix:

|   |       |        |        |        |
|---|-------|--------|--------|--------|
| 6 | 0.997 | -0.995 | 0.425  | -0.485 |
|   | 8     | -1.000 | 0.481  | -0.543 |
|   |       | 7      | -0.488 | 0.559  |
|   |       |        | 5      | -0.881 |
|   |       |        |        | 4      |

## References

- 1 J.-C. Guillemin, G. Bajor, E. H. Riague, B. Khater, and T. Veszprémi, *Organometallics*, 2007, **26**, 2507.
- 2 P. T. Meinke, G. A. Krafft, and A. Guram, *J. Org. Chem.*, 1988, **53**, 3632.
- 3 M. L. Quan and P. Cadiot, *Bull. Soc. Chim. France*, 1965, 45.
- 4 J. K. G. Watson, 'Vibrational Spectra and Structure', ed. J. R. Durig, Elsevier, 1977.
- 5 W. C. Hamilton, 'Statistics in Physical Science', The Ronald Press Company, 1964.
- 6 B. S. Ray, *Z. Physik*, 1932, **78**, 74.
